# Supplementary material for: Enantioselective vinylogous aldol/lactonization cascade reaction between β,γ-unsaturated amides and trifluoromethyl ketones: facile access to chiral trifluoromethyl dihydropyranones
Source: Royal Society of Chemistry journal article supplement (doi:10.1039/d0ob01746a), 2020-01-01
Supplement: d0ob01746a1.pdf [file d0ob01746a1.pdf]

# Supporting information

## **Enantioselective vinylogous aldol/lactonization cascade reaction between $\beta,\gamma$ -unsaturated amides and trifluoromethyl ketones: facile access to chiral trifluoromethyl dihydropyranones**

Jun-Hao Fu, Zhen-Guo Zhang, Xue-Ying Zhou, Chun-Wei Fu, Feng Sha, Xin-Yan Wu\*

*Key Laboratory for Advanced Materials and Institute of Fine Chemicals, School of  
Chemistry & Molecular Engineering, East China University of Science and Technology,  
Shanghai 200237, P. R. China*

E-mail: xinyanwu@ecust.edu.cn

### **Table of Contents**

|                                                                                                                 |            |
|-----------------------------------------------------------------------------------------------------------------|------------|
| <b>1. General Information .....</b>                                                                             | <b>S2</b>  |
| <b>2. General Procedure for the Vinylogous Aldol/Lactonization Cascade Reaction .....</b>                       | <b>S2</b>  |
| <b>3. References .....</b>                                                                                      | <b>S8</b>  |
| <b>4. Copies of <math>^1\text{H}</math> NMR and <math>^{13}\text{C}</math> NMR Spectra for products 3 .....</b> | <b>S9</b>  |
| <b>5. Copies of HPLC Spectra of the Products 3 .....</b>                                                        | <b>S22</b> |

## 1. General Information

$^1\text{H}$  NMR and  $^{13}\text{C}$  NMR spectra were recorded on Bruker 400 spectrometer and the chemical shifts are reported in ppm downfield from tetramethylsilane ( $\delta = 0.00$  ppm) for  $^1\text{H}$  NMR and relative to the central  $\text{CDCl}_3$  resonance ( $\delta = 77.0$  ppm) for  $^{13}\text{C}$  NMR spectroscopy. IR spectra were recorded on Nicolet Magna-I 550 spectrometer. High resolution mass spectra (HRMS) were recorded on Micromass GCT with Electron Spray Ionization (ESI-TOF) resource or Electron Impact Ionization (EI) resource. Optical rotations were measured on a WZZ-2A digital polarimeter at the wavelength of the sodium D-line (589 nm). HPLC analysis was performed on Waters equipment using Daicel Chiralpak AD-H column.

$\text{CH}_2\text{Cl}_2$  and ethyl acetate were distilled from  $\text{CaH}_2$ . Toluene, *p*-xylene, *o*-xylene, *m*-xylene, mesitylene, *tert*-butylbenzene, ethylbenzene, cumene and (trifluoromethyl)benzene were distilled from sodium-benzophenone. All other chemicals were used without purification as commercially available. Thin-layer chromatography (TLC) was performed on 10-40  $\mu\text{m}$  silica gel plates. Column chromatography was performed using silica gel (300-400 mesh) eluted with ethyl acetate and petroleum ether.

Chiral catalysts **C1-C8**<sup>1</sup>,  $\beta,\gamma$ -unsaturated amides **1**<sup>2</sup> and the trifluoromethyl acetophenone **2e**<sup>3</sup> were prepared according to literature procedure.

## 2. General Procedure for the Vinylogous Aldol/Lactonization Cascade

### Reaction

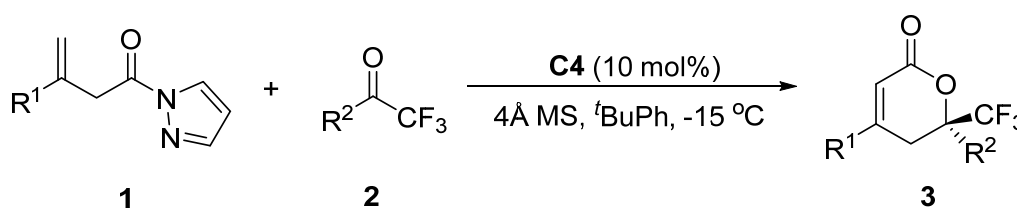

To a solution of trifluoromethyl ketone **2** (0.2 mmol) and catalyst **C4** (0.02 mmol, 10 mol%) in 1 mL *t*BuPh was added  $\beta,\gamma$ -unsaturated amide **1** (0.3 mmol, 1.5 eq.) at  $-15\text{ }^\circ\text{C}$ , and the resulting mixture was stirred at this temperature until the reaction completed (monitored by TLC). The solvent was removed under reduced pressure, and the residue obtained was purified by column chromatography (petroleum ether/EtOAc) to afford the desired product **3**.

**(S)-4,6-diphenyl-6-(trifluoromethyl)-5,6-dihydro-2H-pyran-2-one (3aa)**

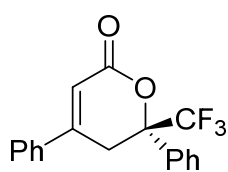

Colorless oil, 57.2 mg, 90% yield, 99% ee,  $[\alpha]_D^{20} +153.9$  (*c* 1.93, CHCl<sub>3</sub>); <sup>1</sup>H NMR (CDCl<sub>3</sub>, 400 MHz):  $\delta$  7.58-7.52 (m, 2H), 7.51-7.42 (m, 5H), 7.41-7.36 (m, 3H), 6.25 (d, *J* = 2.4 Hz, 1H), 3.63 (d, *J* = 17.2 Hz, 1H), 3.52 (dd, *J*<sub>1</sub> = 17.2 Hz, *J*<sub>2</sub> = 2.4 Hz, 1H); HPLC analysis (Daicel Chiralpak AD-H column,  $\lambda$  = 254 nm, eluent: 90/10 hexane/2-propanol, flow rate: 0.9 mL/min): *t*<sub>R</sub> = 11.77 min (major), 16.05 min (minor).

**(S)-6-(4-fluorophenyl)-4-phenyl-6-(trifluoromethyl)-5,6-dihydro-2H-pyran-2-one (3ab)**

**(3ab)**

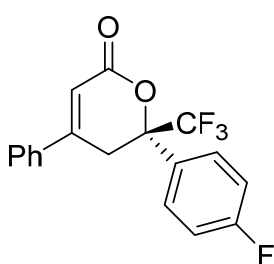

Colorless oil, 55.5 mg, 82% yield, 99% ee,  $[\alpha]_D^{20} +158.4$  (*c* 1.22, CHCl<sub>3</sub>); <sup>1</sup>H NMR (CDCl<sub>3</sub>, 400 MHz):  $\delta$  7.56-7.42 (m, 7H), 7.12-7.04 (m, 2H), 6.26 (d, *J* = 2.4 Hz, 1H), 3.58 (d, *J* = 17.6 Hz, 1H), 3.53 (dd, *J*<sub>1</sub> = 17.6 Hz, *J*<sub>2</sub> = 2.0 Hz, 1H); HPLC analysis (Daicel Chiralpak AD-H column,  $\lambda$  = 254 nm, eluent: 90/10 hexane/2-propanol, flow rate: 0.9 mL/min): *t*<sub>R</sub> = 16.79 min (major), 24.81 min (minor).

**(S)-6-(4-chlorophenyl)-4-phenyl-6-(trifluoromethyl)-5,6-dihydro-2H-pyran-2-one (3ac)**

**(3ac)**

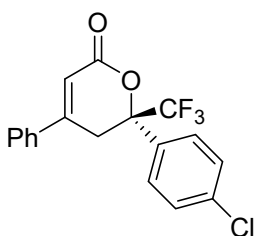

Colorless oil, 70.0 mg, 99% yield, 99% ee,  $[\alpha]_D^{20} +207.3$  (*c* 1.59, CHCl<sub>3</sub>); <sup>1</sup>H NMR (CDCl<sub>3</sub>, 400 MHz):  $\delta$  7.55-7.43 (m, 7H), 7.41 (d, *J* = 8.8 Hz, 2H), 6.26 (d, *J* = 1.2 Hz, 1H), 3.57 (d, *J* = 17.6 Hz, 1H), 3.52 (dd, *J*<sub>1</sub> = 17.6 Hz, *J*<sub>2</sub> = 2.0 Hz, 1H); HPLC analysis (Daicel Chiralpak AD-H column,  $\lambda$  = 254 nm, eluent: 90/10 hexane/2-propanol, flow rate: 0.9 mL/min): *t*<sub>R</sub> = 15.53 min (major), 21.92 min (minor).

**(S)-6-(3-chlorophenyl)-4-phenyl-6-(trifluoromethyl)-5,6-dihydro-2H-pyran-2-one (3ad)**

**(3ad)**

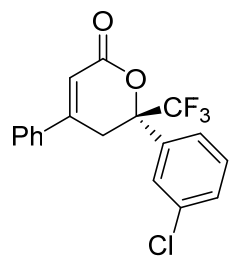

Colorless oil, 69.6 mg, 99% yield, 98% ee,  $[\alpha]_D^{20} +166.1$  (*c* 1.60, CHCl<sub>3</sub>); <sup>1</sup>H NMR (CDCl<sub>3</sub>, 400 MHz):  $\delta$  7.55 (s, 1H), 7.53-7.41 (m, 6H), 7.39 (dt, *J*<sub>1</sub> = 8.0 Hz, *J*<sub>2</sub> = 1.6 Hz, 1H), 7.36-7.31 (m, 1H), 6.29-6.27 (m, 1H), 3.54 (d, *J* = 0.8 Hz, 2H); HPLC analysis (Daicel Chiralpak AD-H column,  $\lambda$  = 254 nm, eluent: 90/10 hexane/2-propanol, flow rate: 0.9 mL/min): *t*<sub>R</sub> = 11.87 min (major), 13.75 min (minor).

**(S)-4-(2-chlorophenyl)-6-phenyl-6-(trifluoromethyl)-5,6-dihydro-2H-pyran-2-one**

**(3ae)**

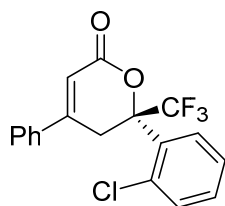

Colorless oil, 20.0 mg, 28% yield, 99% ee,  $[\alpha]_{\text{D}}^{20} +160.8$  ( $c$  0.52,  $\text{CHCl}_3$ );  $^1\text{H NMR}$  ( $\text{CDCl}_3$ , 400 MHz):  $\delta$  7.87-7.81 (m, 1H), 7.58 (dd,  $J_1 = 8.0$  Hz,  $J_2 = 1.6$  Hz, 2H), 7.51-7.38 (m, 4H), 7.37-7.30 (m, 2H), 6.30 (d,  $J = 2.0$  Hz, 1H), 6.30 (d,  $J = 2.0$  Hz, 1H), 4.57 (d,  $J = 18.0$  Hz, 1H), 3.56 (dd,  $J_1 = 18.0$  Hz,  $J_2 = 2.4$  Hz, 1H);  $^{13}\text{C MNR}$  (100 MHz,  $\text{CDCl}_3$ ):  $\delta$  161.7, 152.6, 135.2, 132.8, 132.3, 131.2, 131.1, 131.0, 130.7, 129.2, 127.4, 126.3, 123.6 (q,  $J = 283.6$  Hz), 114.0, 83.3 (q,  $J = 31.0$  Hz), 29.1; IR (KBr,  $\text{cm}^{-1}$ ):  $\nu$  3445, 3064, 2962, 2920, 1734, 1617, 1429, 1259, 1194, 1030, 870, 761, 685; HRMS (ESI) calcd for  $\text{C}_{18}\text{H}_{16}^{35}\text{ClF}_3\text{NO}_2^+$  and  $\text{C}_{18}\text{H}_{16}^{37}\text{ClF}_3\text{NO}_2^+$  ( $[\text{M} + \text{NH}_4]^+$ ): 370.0816 and 372.0787, found: 370.0810 and 372.0792; HPLC analysis (Daicel Chiralpak AD-H column,  $\lambda = 254$  nm, eluent: 90/10 hexane/2-propanol, flow rate: 0.9 mL/min):  $t_{\text{R}} = 12.96$  min (major), 17.52 min (minor).

**(S)-4-(4-bromophenyl)-6-phenyl-6-(trifluoromethyl)-5,6-dihydro-2H-pyran-2-one**

**(3af)**

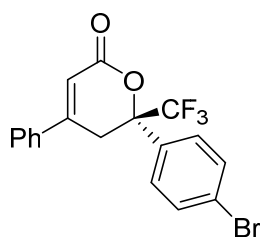

Colorless oil, 76.4 mg, 96% yield, 99% ee,  $[\alpha]_{\text{D}}^{20} +187.2$  ( $c$  2.20,  $\text{CHCl}_3$ );  $^1\text{H NMR}$  ( $\text{CDCl}_3$ , 400 MHz):  $\delta$  7.52-7.42 (m, 7 H), 7.36 (dt,  $J_1 = 8.8$  Hz,  $J_2 = 2.4$  Hz, 2H), 6.26 (d,  $J = 1.6$  Hz, 1H), 3.58 (d,  $J = 17.6$  Hz, 1H), 3.52 (dd,  $J_1 = 17.6$  Hz,  $J_2 = 2.0$  Hz, 1H); HPLC analysis (Daicel Chiralpak AD-H column,  $\lambda = 254$  nm, eluent: 90/10 hexane/2-propanol, flow rate: 0.9 mL/min):  $t_{\text{R}} = 17.04$  min (major), 22.82 min (minor).

**(S)-4-phenyl-6-(p-tolyl)-6-(trifluoromethyl)-5,6-dihydro-2H-pyran-2-one (3ag)**

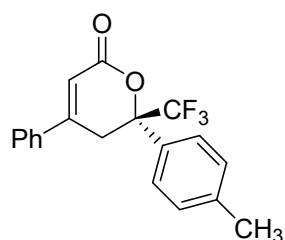

Colorless oil, 40.1 mg, 60% yield, 99% ee,  $[\alpha]_{\text{D}}^{20} +163.5$  ( $c$  0.89,  $\text{CHCl}_3$ );  $^1\text{H NMR}$  ( $\text{CDCl}_3$ , 400 MHz):  $\delta$  7.52-7.39 (m, 7H), 7.19 (d,  $J = 8.0$  Hz, 2H), 6.24 (d,  $J = 2.4$  Hz, 1H), 3.60 (d,  $J = 17.6$  Hz, 1H), 3.49 (dd,  $J_1 = 17.6$  Hz,  $J_2 = 2.4$  Hz, 1H), 2.33 (s, 3H); HPLC analysis (Daicel Chiralpak AD-H column,  $\lambda = 254$  nm, eluent: 90/10 hexane/2-propanol, flow rate: 0.9 mL/min):  $t_{\text{R}} = 13.60$  min (major), 18.25 min (minor).

**(*S,E*)-4-phenyl-6-styryl-6-(trifluoromethyl)-5,6-dihydro-2H-pyran-2-one (3ah)**

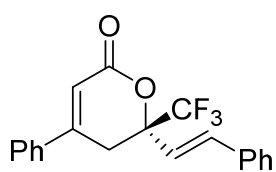

Colorless oil, 60.3 mg, 88% yield, 99% ee,  $[\alpha]_{\text{D}}^{20} +147.0$  (*c* 0.30,  $\text{CHCl}_3$ );  $^1\text{H}$  NMR ( $\text{CDCl}_3$ , 400 MHz):  $\delta$  7.58-7.43 (m, 5H), 7.39-7.26 (m, 5H), 6.92 (d,  $J = 16.0$  Hz, 1H), 6.38 (d,  $J = 2.0$  Hz, 1H), 6.13 (d,  $J = 16.0$  Hz, 1H), 3.39 (dd,  $J_1 = 17.2$  Hz,  $J_2 = 2.0$  Hz, 1H), 3.16 (d,  $J = 17.2$  Hz, 1H);  $^{13}\text{C}$  MNR (100 MHz,  $\text{CDCl}_3$ ):  $\delta$  161.8, 151.3, 136.4, 135.4, 134.6, 131.2, 129.2, 129.1, 128.7, 127.0, 126.0, 123.3 (q,  $J = 282.1$  Hz), 121.1, 114.4, 81.1 (q,  $J = 30.3$  Hz), 29.6; IR (KBr,  $\text{cm}^{-1}$ ):  $\nu$  3029, 1720, 1625, 1448, 1230, 1172, 1021, 970, 748, 689; HRMS (EI) calcd for  $\text{C}_{20}\text{H}_{15}\text{F}_3\text{O}_2^+$  ( $[\text{M}]^+$ ): 344.1019, found: 344.1027; HPLC analysis (Daicel Chiralpak AD-H column,  $\lambda = 254$  nm, eluent: 90/10 hexane/2-propanol, flow rate: 0.9 mL/min):  $t_{\text{R}} = 25.10$  min (major), 18.73 min (minor).

**(*R*)-6-ethyl-4-phenyl-6-(trifluoromethyl)-5,6-dihydro-2H-pyran-2-one (3ai)**

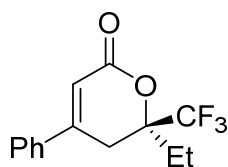

Colorless oil, 11.8 mg, 22% yield, 99% ee,  $[\alpha]_{\text{D}}^{20} +48.3$  (*c* 0.06,  $\text{CHCl}_3$ );  $^1\text{H}$  NMR ( $\text{CDCl}_3$ , 400 MHz):  $\delta$  7.57-7.44 (m, 5H), 6.39 (s, 1H), 3.13 (dd,  $J_1 = 18.4$  Hz,  $J_2 = 1.6$  Hz, 1H), 2.97 (d,  $J = 18.4$  Hz, 1H), 2.18-2.06 (m, 1H), 2.05-1.93 (m, 1H), 1.08 (t,  $J = 7.2$  Hz, 3H); HPLC analysis (Daicel Chiralpak AD-H column,  $\lambda = 254$  nm, eluent: 90/10 hexane/2-propanol, flow rate: 0.9 mL/min):  $t_{\text{R}} = 20.86$  min (major), 28.26 min (minor).

**(*S*)-6-phenyl-4-(*p*-tolyl)-6-(trifluoromethyl)-5,6-dihydro-2H-pyran-2-one (3ba)**

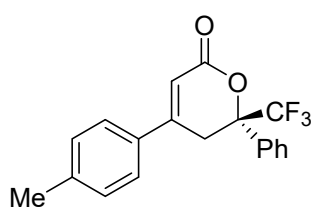

Colorless oil, 40.6 mg, 61% yield, 99% ee,  $[\alpha]_{\text{D}}^{20} +173.2$  (*c* 0.71,  $\text{CHCl}_3$ );  $^1\text{H}$  NMR ( $\text{CDCl}_3$ , 400 MHz):  $\delta$  7.57-7.50 (m, 2H), 7.42-7.35 (m, 5H), 7.25 (d,  $J = 8.4$  Hz, 2H), 6.22 (d,  $J = 2.4$  Hz, 1H), 3.62 (d,  $J = 17.6$  Hz, 1H), 3.49 (dd,  $J_1 = 17.6$  Hz,  $J_2 = 2.4$  Hz, 1H), 2.39 (s, 3H); HPLC analysis (Daicel Chiralpak AD-H column,  $\lambda = 254$  nm, eluent: 90/10 hexane/2-propanol, flow rate: 0.9 mL/min):  $t_{\text{R}} = 16.63$  min (major), 27.04 min (minor).

**(*S*)-4-(4-fluorophenyl)-6-phenyl-6-(trifluoromethyl)-5,6-dihydro-2H-pyran-2-one (3ca)**

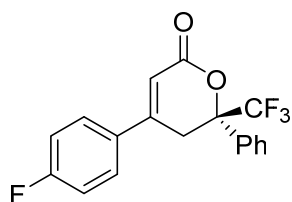

Colorless oil, 56.5 mg, 84% yield, 99% ee,  $[\alpha]_{\text{D}}^{20} +190.2$  (*c* 1.92,  $\text{CHCl}_3$ );  $^1\text{H}$  NMR ( $\text{CDCl}_3$ , 400 MHz):  $\delta$  7.56-7.46 (m, 4H), 7.43-7.36 (m, 3H), 7.17-7.11 (m, 2H), 6.21 (d,  $J = 2.0$  Hz, 1H), 3.58 (d,  $J = 17.2$  Hz, 1H), 3.51 (dd,  $J_1 = 17.6$  Hz,  $J_2 = 2.4$  Hz, 1H);

$^{13}\text{C}$  MNR (100 MHz,  $\text{CDCl}_3$ ):  $\delta$  163.4 (d,  $J = 248.7$  Hz), 161.5, 151.9, 135.3, 131.3, 129.5 (d,  $J = 3.4$  Hz), 129.2, 128.6 (d,  $J = 8.4$  Hz), 125.9, 123.1 (q,  $J = 282.0$  Hz), 115.9 (d,  $J = 21.7$  Hz), 114.8, 82.1 (q,  $J = 40.0$  Hz), 29.6; IR (KBr,  $\text{cm}^{-1}$ ):  $\nu$  3438, 3083, 2975, 2925, 1729, 1606, 1511, 1448, 1241, 1174, 1049, 995, 767, 688, 522; HRMS (ESI) calcd for  $\text{C}_{18}\text{H}_{12}\text{F}_4\text{O}_2\text{Na}^+$  ( $[\text{M} + \text{Na}]^+$ ): 359.0666, found: 359.0670; HPLC analysis (Daicel Chiralpak AD-H column,  $\lambda = 254$  nm, eluent: 90/10 hexane/2-propanol, flow rate: 0.9 mL/min):  $t_{\text{R}} = 15.01$  min (major), 22.47 min (minor).

**(S)-4-(3-chlorophenyl)-6-phenyl-6-(trifluoromethyl)-5,6-dihydro-2H-pyran-2-one**

**(3da)**

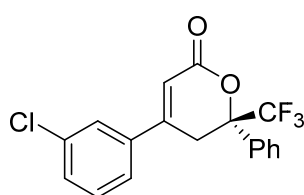

Colorless oil, 56.4 mg, 80% yield, 99% ee,  $[\alpha]_{\text{D}}^{20} +153.6$  ( $c$  1.65,  $\text{CHCl}_3$ );  $^1\text{H}$  NMR ( $\text{CDCl}_3$ , 400 MHz):  $\delta$  7.56-7.50 (m, 2H), 7.47-7.43 (m, 2H), 7.43-7.34 (m, 5H), 6.25 (d,  $J = 1.6$  Hz, 1H), 3.57 (d,  $J = 17.6$  Hz, 1H), 3.51 (dd,  $J_1 = 17.6$  Hz,  $J_2 = 2.4$  Hz, 1H); HPLC analysis (Daicel Chiralpak AD-H column,  $\lambda = 254$

nm, eluent: 90/10 hexane/2-propanol, flow rate: 0.9 mL/min):  $t_{\text{R}} = 9.56$  min (major), 11.48 min (minor).

**(S)-4-(4-chlorophenyl)-6-phenyl-6-(trifluoromethyl)-5,6-dihydro-2H-pyran-2-one**

**(3ea)**

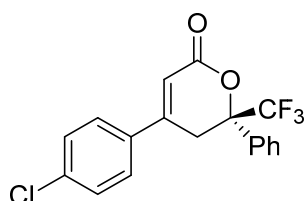

Colorless oil, 55.8 mg, 79% yield, 99% ee,  $[\alpha]_{\text{D}}^{20} +139.2$  ( $c$  1.49,  $\text{CHCl}_3$ );  $^1\text{H}$  NMR ( $\text{CDCl}_3$ , 400 MHz):  $\delta$  7.55-7.49 (m, 2H), 7.46-7.36 (m, 7H), 6.23 (d,  $J = 2.4$  Hz, 1H), 3.57 (d,  $J = 17.6$  Hz, 1H), 3.51 (dd,  $J_1 = 17.6$  Hz,  $J_2 = 2.4$  Hz, 1H); HPLC analysis

(Daicel Chiralpak AD-H column,  $\lambda = 254$  nm, eluent: 90/10 hexane/2-propanol, flow rate: 0.9 mL/min):  $t_{\text{R}} = 22.48$  min (major), 34.26 min (minor).

**(S)-6-phenyl-6-(trifluoromethyl)-4-(4-(trifluoromethyl)phenyl)-5,6-dihydro-2H-pyran-2-one (3fa)**

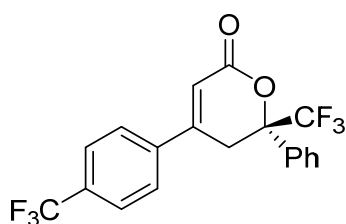

Colorless oil, 71.2 mg, 92% yield, 99% ee,  $[\alpha]_{\text{D}}^{20} +187.2$  ( $c$  1.49,  $\text{CHCl}_3$ );  $^1\text{H}$  NMR ( $\text{CDCl}_3$ , 400 MHz):  $\delta$  7.71 (d,  $J = 8.0$  Hz, 2H), 7.59 (d,  $J = 8.4$  Hz, 2H), 7.56-7.50 (m, 2H), 7.44-7.37 (m, 3H), 6.30 (s, 1H), 3.64-3.53 (m, 2H);  $^{13}\text{C}$  MNR

(100 MHz,  $\text{CDCl}_3$ ):  $\delta$  161.2, 150.4, 139.0, 133.4, 132.7 (q,  $J = 32.8$  Hz), 129.9, 128.9, 126.4, 126.4, 126.2 (q,  $J = 3.8$  Hz), 123.5 (q,  $J = 270.7$  Hz),

123.2 (q,  $J = 281.9$  Hz), 116.9, 82.6 (q,  $J = 40.0$  Hz), 29.8; IR (KBr,  $\text{cm}^{-1}$ ):  $\nu$  2927, 1729, 1415, 1326, 1170, 1126, 1070, 1049, 844, 719; HRMS (EI) calcd for  $\text{C}_{19}\text{H}_{12}\text{F}_6\text{O}_2^+$  ( $[\text{M}]^+$ ): 386.0736, found: 386.0740; HPLC analysis (Daicel Chiralpak AD-H column,  $\lambda = 254$  nm, eluent: 90/10 hexane/2-propanol, flow rate: 0.9 mL/min):  $t_{\text{R}} = 15.46$  min (major), 18.58 min (minor).

**(S)-4-(3,4-dichlorophenyl)-6-phenyl-6-(trifluoromethyl)-5,6-dihydro-2H-pyran-2-one (3ga)**

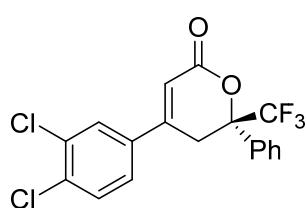

Colorless oil, 76.1 mg, 99% yield, 99% ee,  $[\alpha]_{\text{D}}^{20} +193.4$  ( $c$  2.17,  $\text{CHCl}_3$ );  $^1\text{H}$  NMR ( $\text{CDCl}_3$ , 400 MHz):  $\delta$  7.56 (d,  $J = 2.0$  Hz, 1H), 7.55-7.47 (m, 3H), 7.44-7.37 (m, 3H), 7.33 (dd,  $J_1 = 8.4$  Hz,  $J_2 = 2.0$  Hz, 1H); 6.25 (s, 1H), 3.52 (s, 2H);  $^{13}\text{C}$  MNR (100 MHz,  $\text{CDCl}_3$ ):  $\delta$  161.1, 149.3, 135.5, 135.3, 133.8, 133.3, 131.2, 129.9, 128.9, 127.8, 126.4, 125.0, 123.1 (q,  $J = 282.1$  Hz), 116.2, 82.5 (q,  $J = 30.0$  Hz), 29.5; IR (KBr,  $\text{cm}^{-1}$ ):  $\nu$  2921, 1747, 1245, 1178, 1101, 1045, 1031, 991, 804, 777, 701; HRMS (EI) calcd for  $\text{C}_{19}\text{H}_{11}\text{O}_2\text{F}_3^{35}\text{Cl}_2^+$ ,  $\text{C}_{19}\text{H}_{11}\text{O}_2\text{F}_3^{35}\text{Cl}^{37}\text{Cl}^+$  and  $\text{C}_{19}\text{H}_{11}\text{O}_2\text{F}_3^{37}\text{Cl}_2^+$  ( $[\text{M}]^+$ ): 386.0083, 388.0053 and 390.0024, found: 386.0086, 388.0063 and 390.0022; HPLC analysis (Daicel Chiralpak AD-H column,  $\lambda = 254$  nm, eluent: 90/10 hexane/2-propanol, flow rate: 0.9 mL/min):  $t_{\text{R}} = 17.23$  min (major), 20.06 min (minor).

**(S)-6-phenyl-4-(thiophen-2-yl)-6-(trifluoromethyl)-5,6-dihydro-2H-pyran-2-one (3ha)**

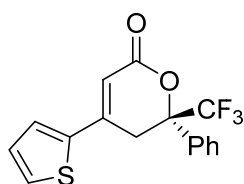

Colorless oil, 54.1 mg, 83% yield, 99% ee,  $[\alpha]_{\text{D}}^{20} +189.7$  ( $c$  1.67,  $\text{CHCl}_3$ );  $^1\text{H}$  NMR ( $\text{CDCl}_3$ , 400 MHz):  $\delta$  7.59-7.53 (m, 2H), 7.52 (d,  $J = 5.2$  Hz, 1H), 7.46 (d,  $J = 3.6$  Hz, 1H), 7.42-7.34 (m, 3H), 7.15 (dd,  $J_1 = 4.8$  Hz,  $J_2 = 4.0$  Hz, 1H), 6.17 (d,  $J = 2.0$  Hz, 1H), 3.62 (d,  $J = 17.2$  Hz, 1H), 3.50 (dd,  $J_1 = 17.2$  Hz,  $J_2 = 2.0$  Hz, 1H); HPLC analysis (Daicel Chiralpak AD-H column,  $\lambda = 254$  nm, eluent: 90/10 hexane/2-propanol, flow rate: 0.9 mL/min):  $t_{\text{R}} = 21.51$  min (major), 26.18 min (minor).

**(S)-4-(naphthalen-1-yl)-6-phenyl-6-(trifluoromethyl)-5,6-dihydro-2H-pyran-2-one (3ia)**

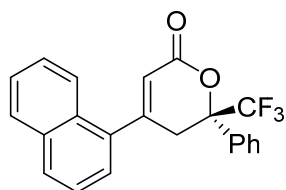

Colorless oil, 37.7 mg, 51% yield, 96% ee,  $[\alpha]_{\text{D}}^{20} +171.2$  ( $c$  0.87,  $\text{CHCl}_3$ );  $^1\text{H}$  NMR ( $\text{CDCl}_3$ , 400 MHz):  $\delta$  7.88 (d,  $J = 8.0$  Hz, 2H), 7.62-7.56 (d,  $J = 8.0$  Hz, 2H), 7.54-7.37 (m, 7H), 7.20 (d,  $J = 6.8$  Hz, 1H), 6.12 (d,  $J = 2.4$  Hz, 1H), 3.74 (dd,  $J_1 = 17.6$  Hz,  $J_2 = 2.4$

Hz, 1H), 3.45 (d,  $J = 17.6$  Hz, 1H);  $^{13}\text{C}$  MNR (100 MHz,  $\text{CDCl}_3$ ):  $\delta$  161.2, 153.7, 135.5, 133.8, 133.7, 130.0, 129.8, 129.5, 128.9, 128.7, 127.0, 126.8, 126.6, 125.1, 124.5, 124.3, 123.3 (q,  $J = 282.0$  Hz), 120.0, 82.9 (q,  $J = 30.5$  Hz), 33.6; IR (KBr,  $\text{cm}^{-1}$ ):  $\nu$  2923, 1727, 1398, 1255, 1174, 1051, 869, 819, 700; HRMS (EI) calcd for  $\text{C}_{22}\text{H}_{15}\text{F}_3\text{O}_2^+$  ( $[\text{M}]^+$ ): 368.1019, found: 368.1026; HPLC analysis (Daicel Chiralpak AD-H column,  $\lambda = 254$  nm, eluent: 90/10 hexane/2-propanol, flow rate: 0.9 mL/min):  $t_{\text{R}} = 8.41$  min (major), 11.25 min (minor).

**(S)-4-butyl-6-phenyl-6-(trifluoromethyl)-5,6-dihydro-2H-pyran-2-one (3ja)**

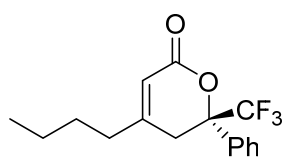

Colorless oil, 34.1 mg, 57% yield, 99% ee,  $[\alpha]_{\text{D}}^{20} +118.8$  ( $c$  0.55,  $\text{CHCl}_3$ );  $^1\text{H}$  NMR ( $\text{CDCl}_3$ , 400 MHz):  $\delta$  7.54-7.47 (m, 2H), 7.44-7.38 (m, 3H), 5.74 (s, 1H), 3.15 (dd,  $J_1 = 18.0$  Hz,  $J_2 = 1.6$  Hz, 1H), 3.01 (d,  $J = 17.6$  Hz, 1H), 2.20 (t,  $J = 7.6$  Hz, 2H), 1.51-1.33 (m, 2H), 1.30-1.10 (m, 2H), 0.86 (t,  $J = 7.6$  Hz, 3H);  $^{13}\text{C}$  MNR (100 MHz,  $\text{CDCl}_3$ ):  $\delta$  161.5, 157.8, 134.0, 129.6, 128.7, 126.4, 123.2 (q,  $J = 281.8$  Hz), 115.7, 82.3 (q,  $J = 30.4$  Hz), 36.6, 31.3, 28.0, 22.0, 13.7; IR (KBr,  $\text{cm}^{-1}$ ):  $\nu$  2933, 1741, 1452, 1238, 1172, 1047, 993, 871, 759, 719; HRMS (EI) calcd for  $\text{C}_{16}\text{H}_{17}\text{F}_3\text{O}_2^+$  ( $[\text{M}]^+$ ): 298.1175, found: 298.1182; HPLC analysis (Daicel Chiralpak AD-H column,  $\lambda = 254$  nm, eluent: 95/5 hexane/2-propanol, flow rate: 0.9 mL/min):  $t_{\text{R}} = 11.39$  min (major), 12.45 min (minor).

### 3. References

1. (a) B. Vakulya, S. Varga, A. Csámpai, T. Soós, *Org. Lett.*, 2005, **7**, 1967-1969; (b) T. Okino, Y. Hoashi, T. Furukawa, X. Xu, Y. Takemoto, *J. Am. Chem. Soc.*, 2005, **127**, 119-125; (c) A. Berkessel, S. Mukherjee, T. N. Müller, F. Cleemann, K. Roland, M. Brandenburg, J.-M. Neudörfl, J. Lex, *Org. Biomol. Chem.*, 2006, **4**, 4319-4330; (d) S.-Z. Nie, Z.-P. Hu, Y.-N. Xuan, J.-J. Wang, X.-M. Li, M. Yan, *Tetrahedron: Asymmetry*, 2010, **21**, 2055-2059; (e) W. Yang, D.-M. Du, *Adv. Synth. Catal.*, 2011, **353**, 1241-1246; (f) H. Wang, Y. Wang, H. Song, Z. Zhou, C. Tang, *Eur. J. Org. Chem.*, 2013, 4844-4851.
2. T.-Z. Li, Y. Jiang, Y.-Q. Guan, F. Sha and X.-Y. Wu, *Chem. Commun.*, 2014, **50**, 10790-10792.
3. H. Cheng, Y. Pei, F. Leng, J. Li, A. Liang, D. Zou, Y. Wu, Y. Wu, *Tetrahedron Lett.*, 2013, **54**, 4483-4486.



#### 4. Copies of $^1\text{H}$ NMR and $^{13}\text{C}$ NMR Spectra for products 3

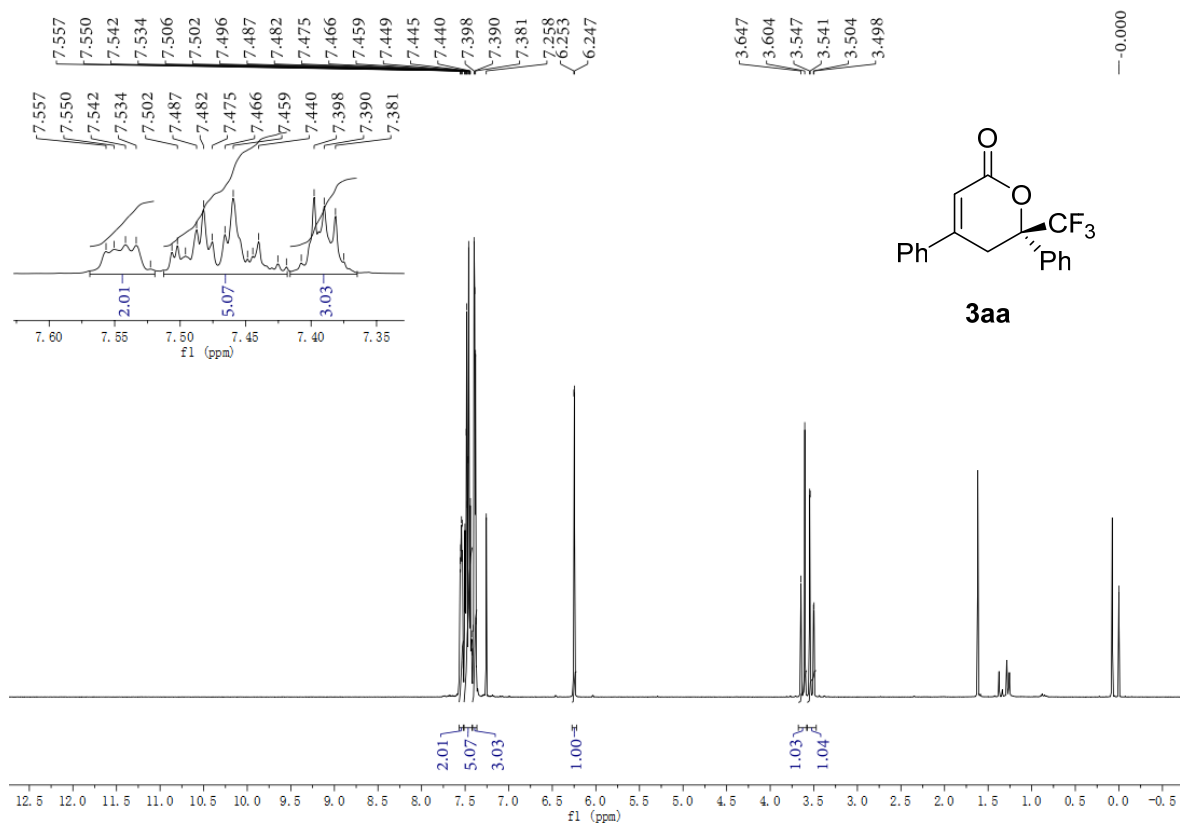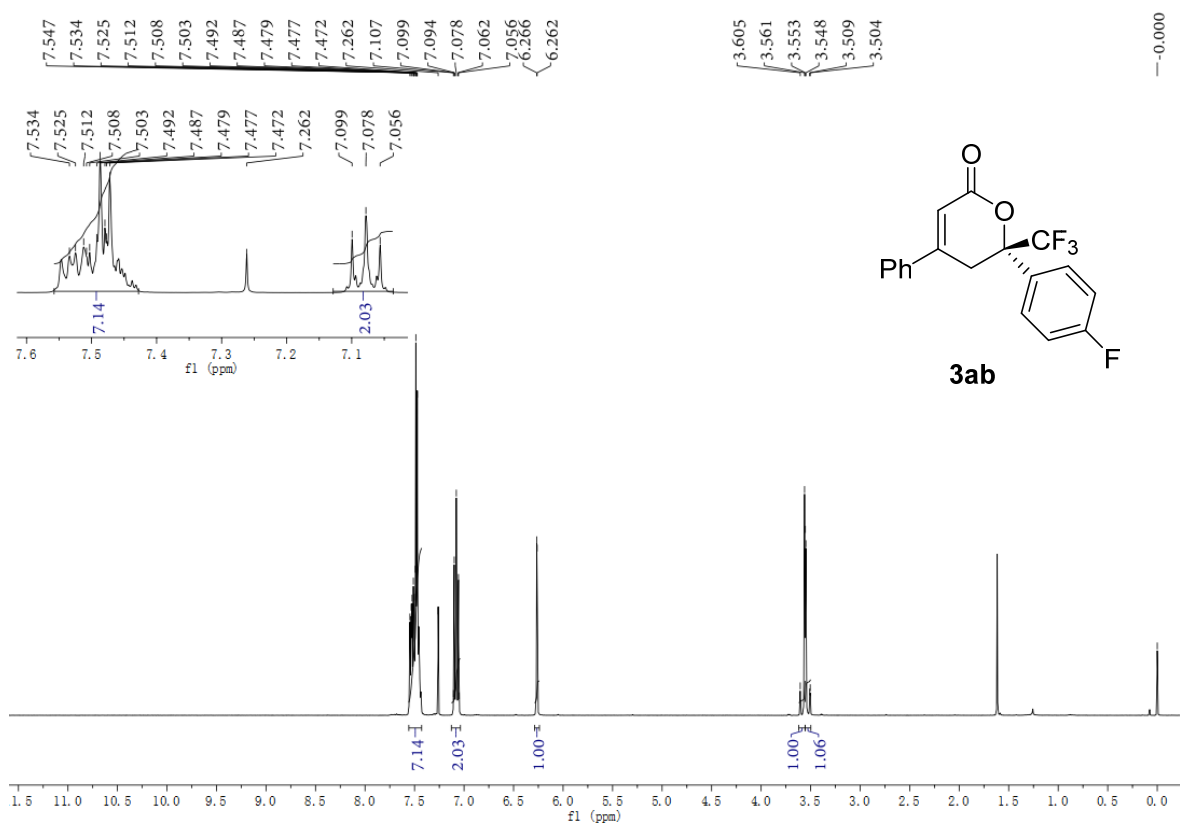

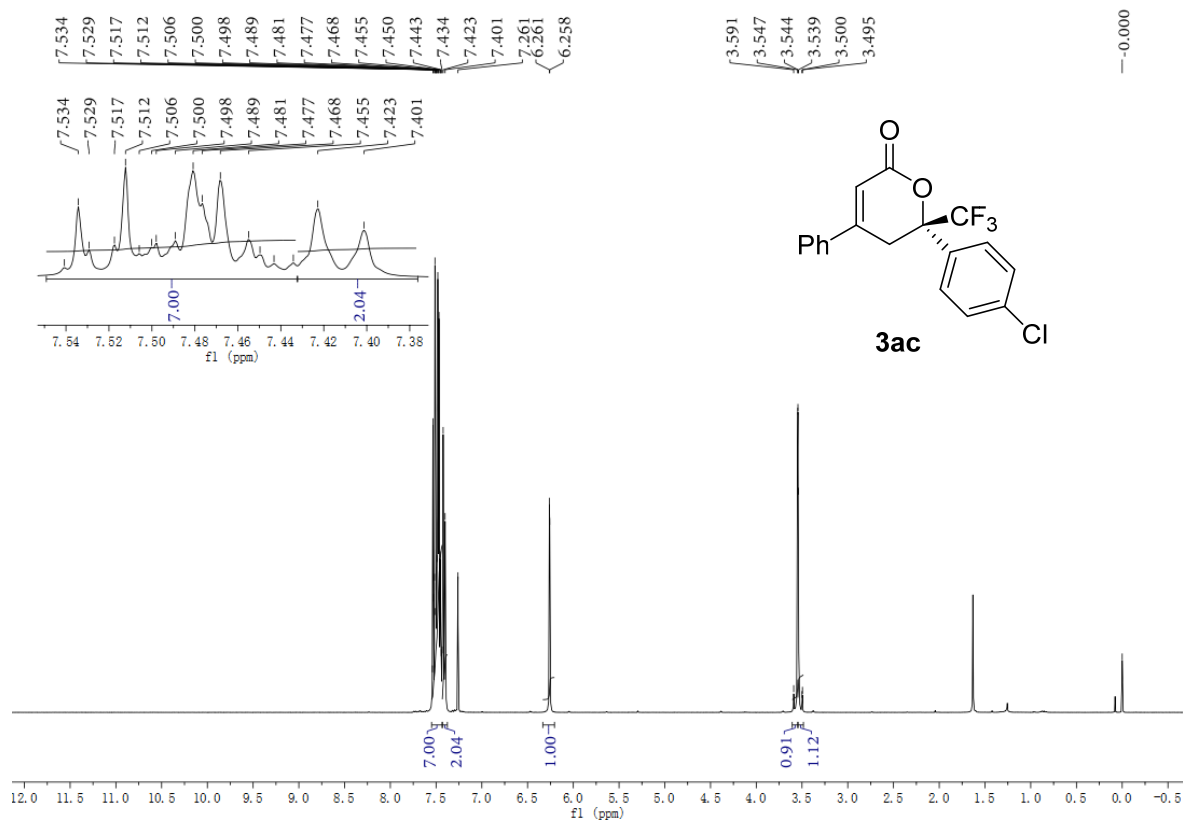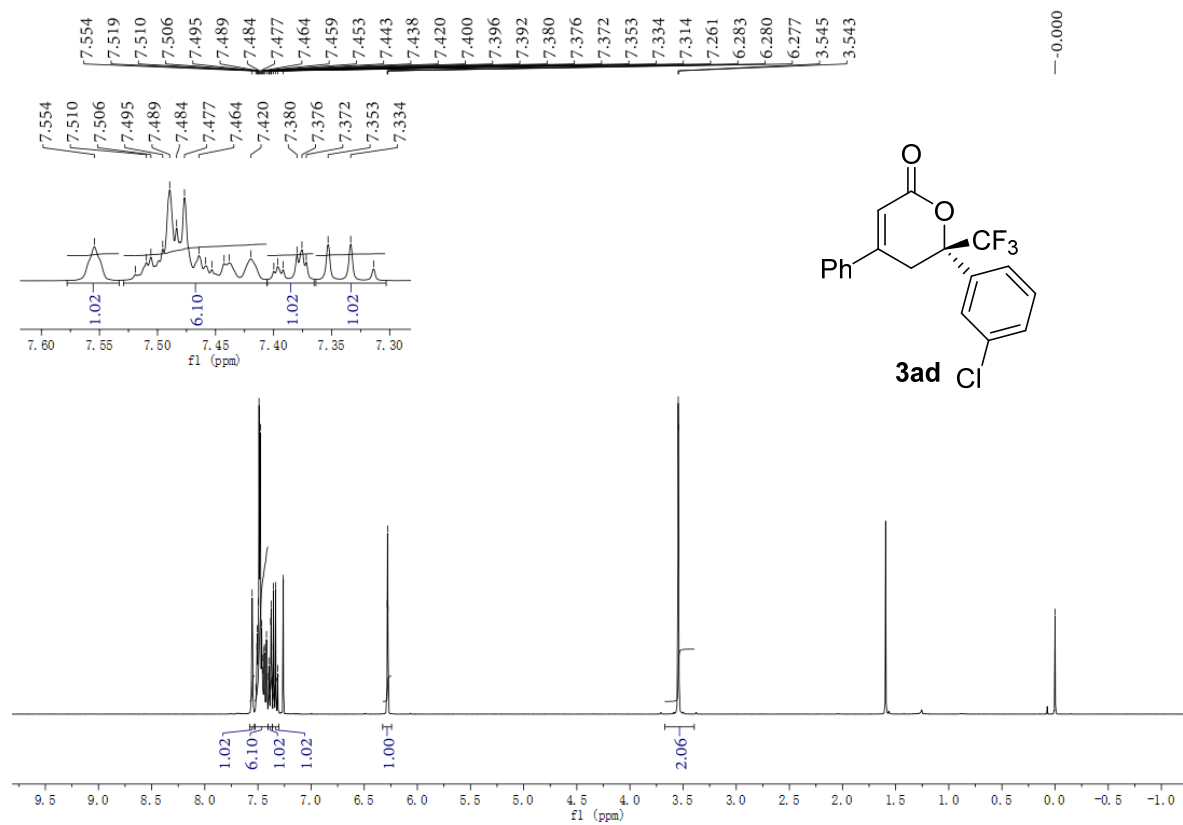

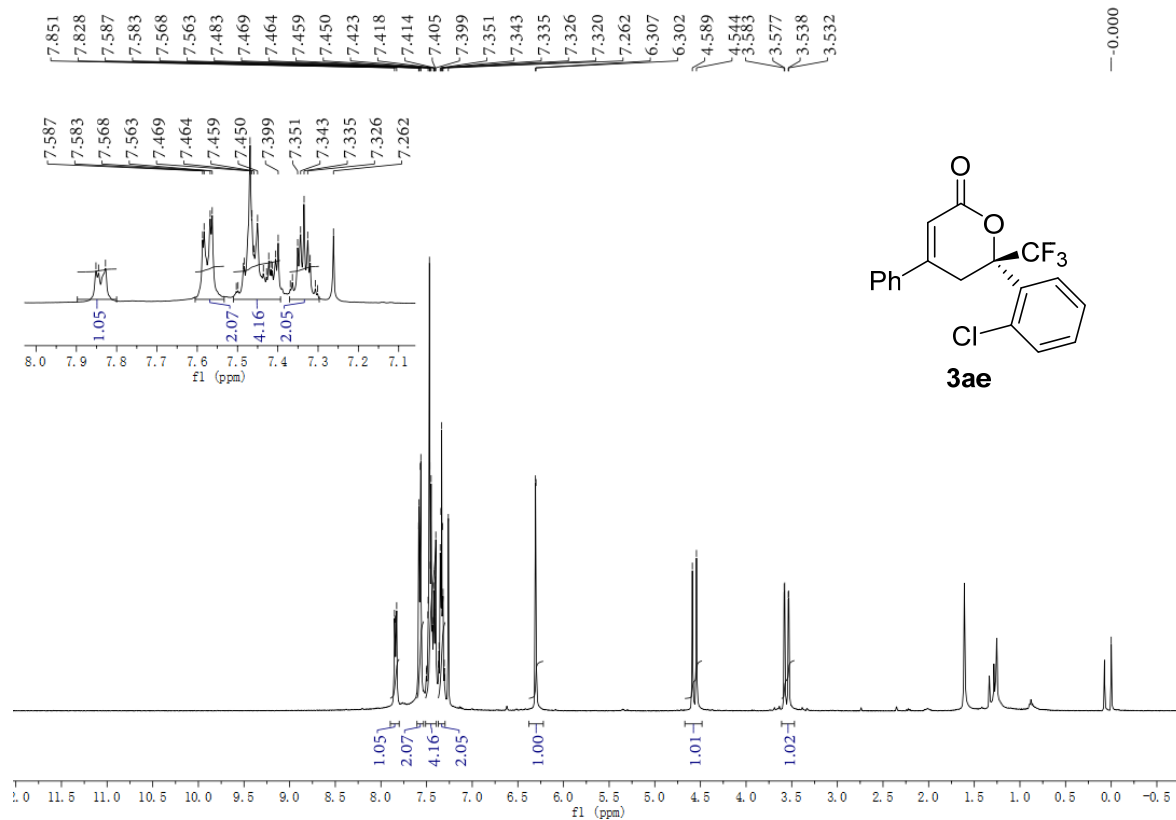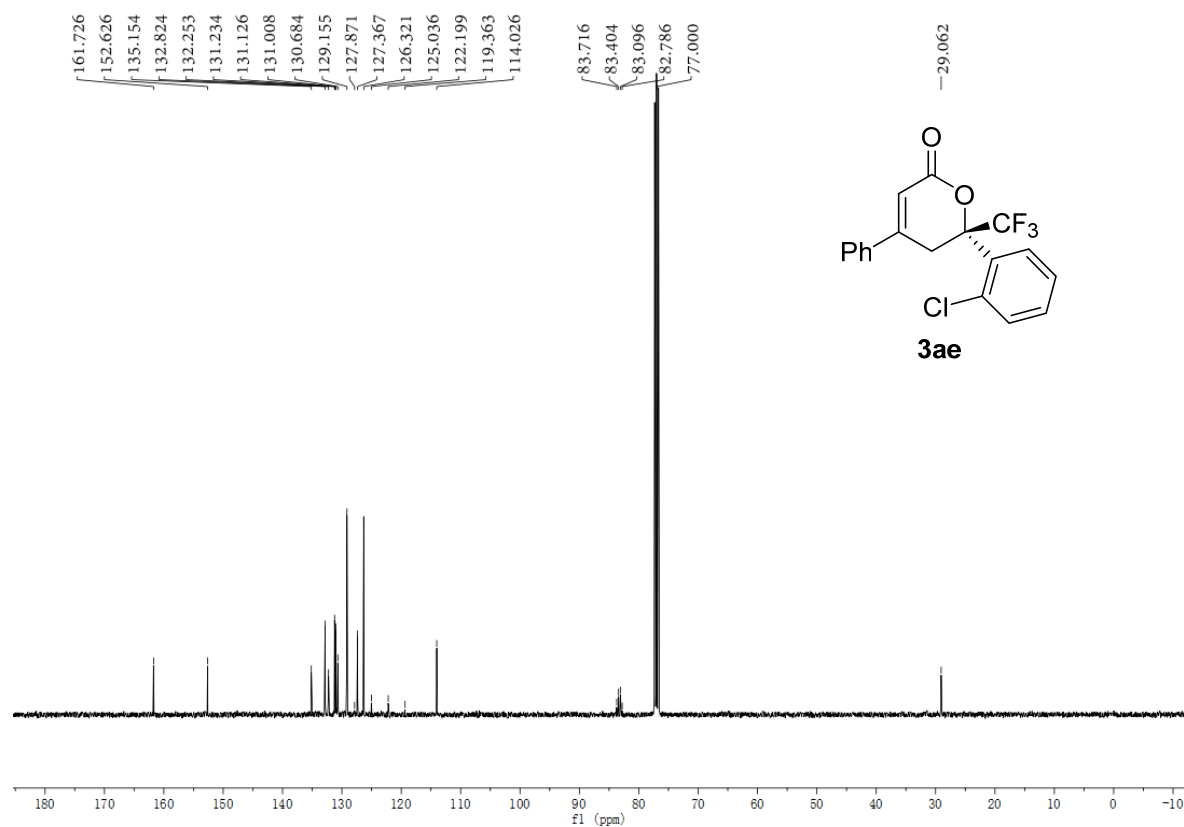

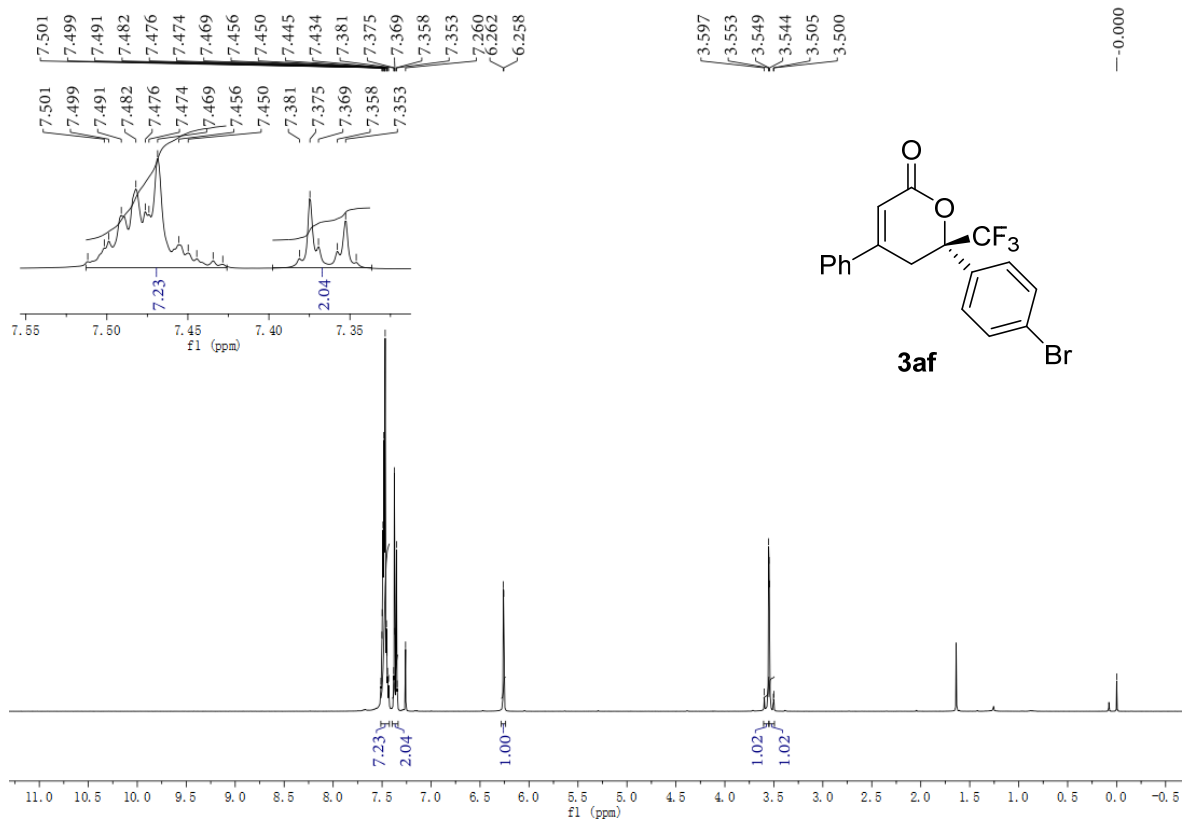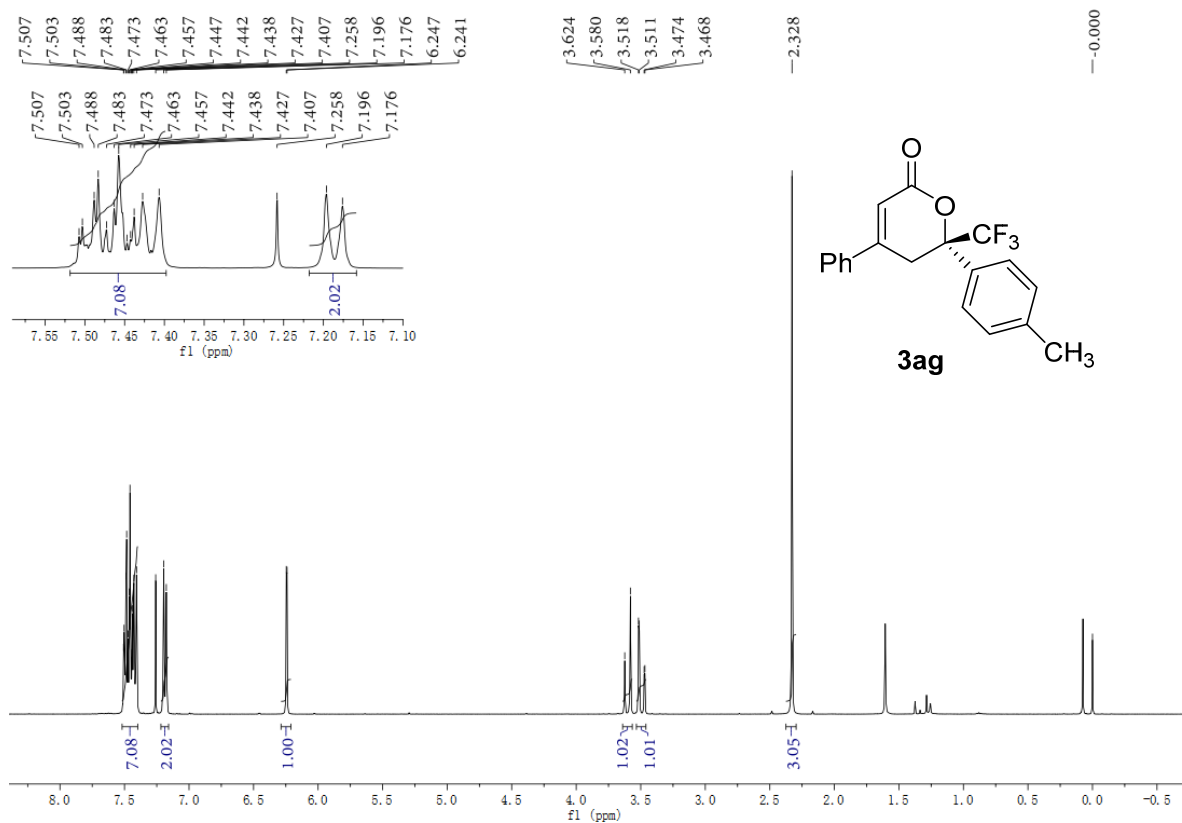

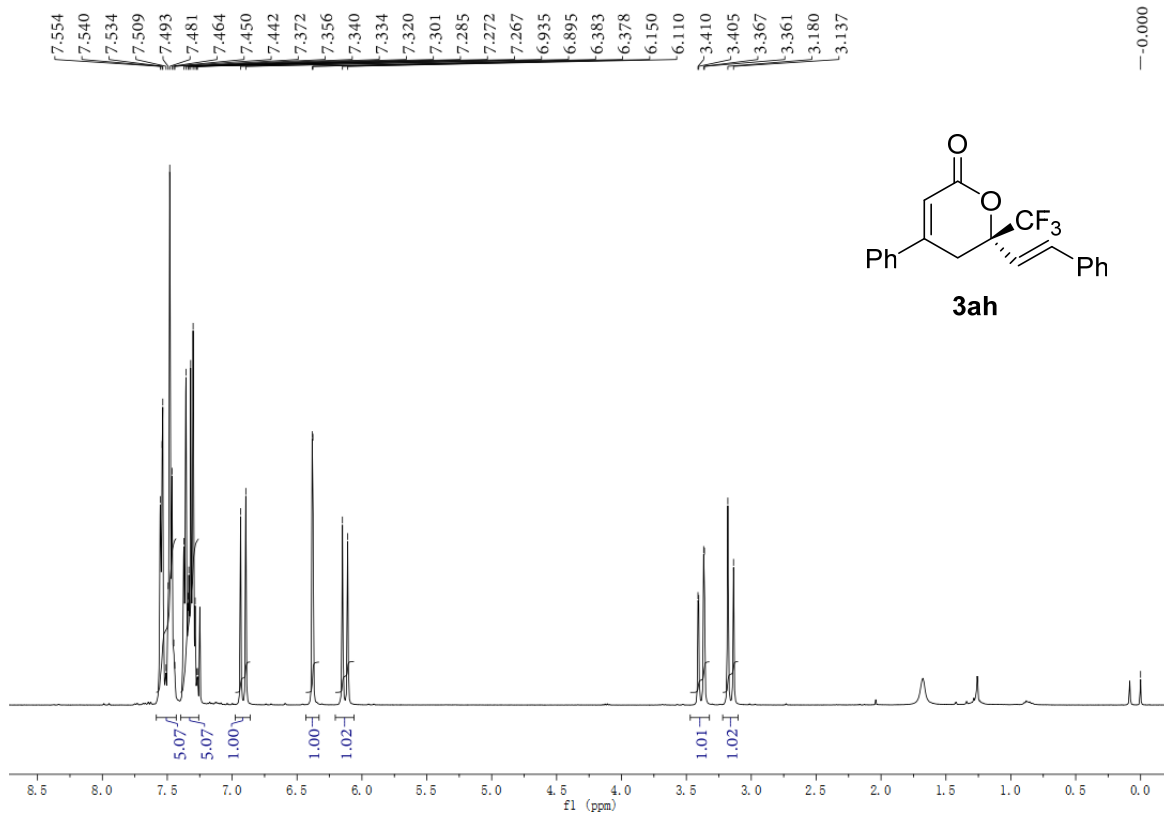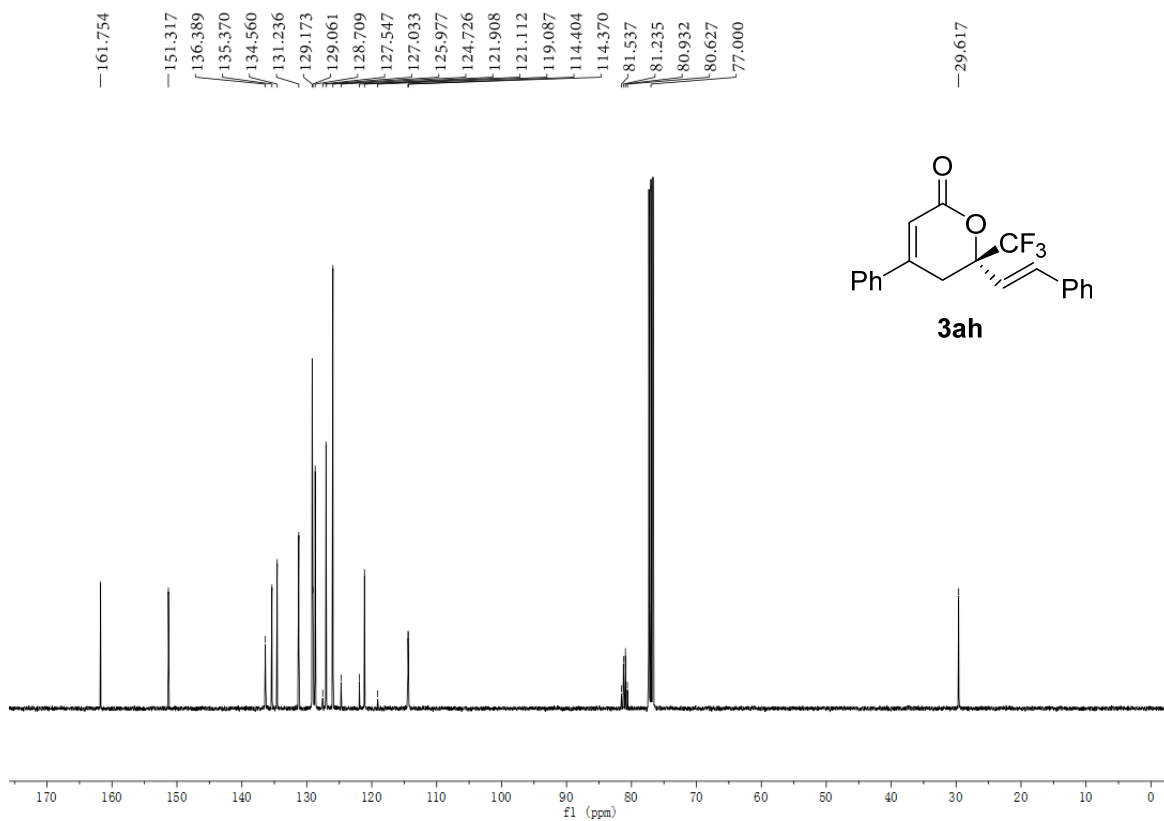

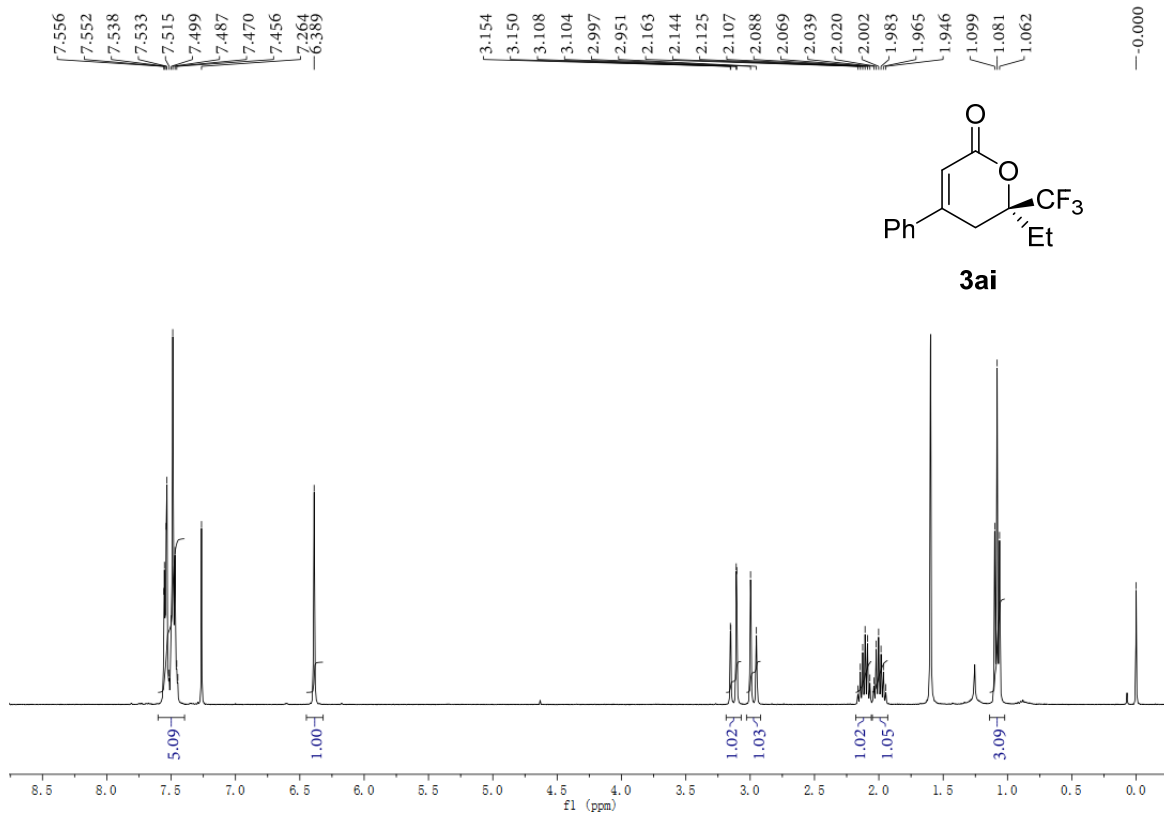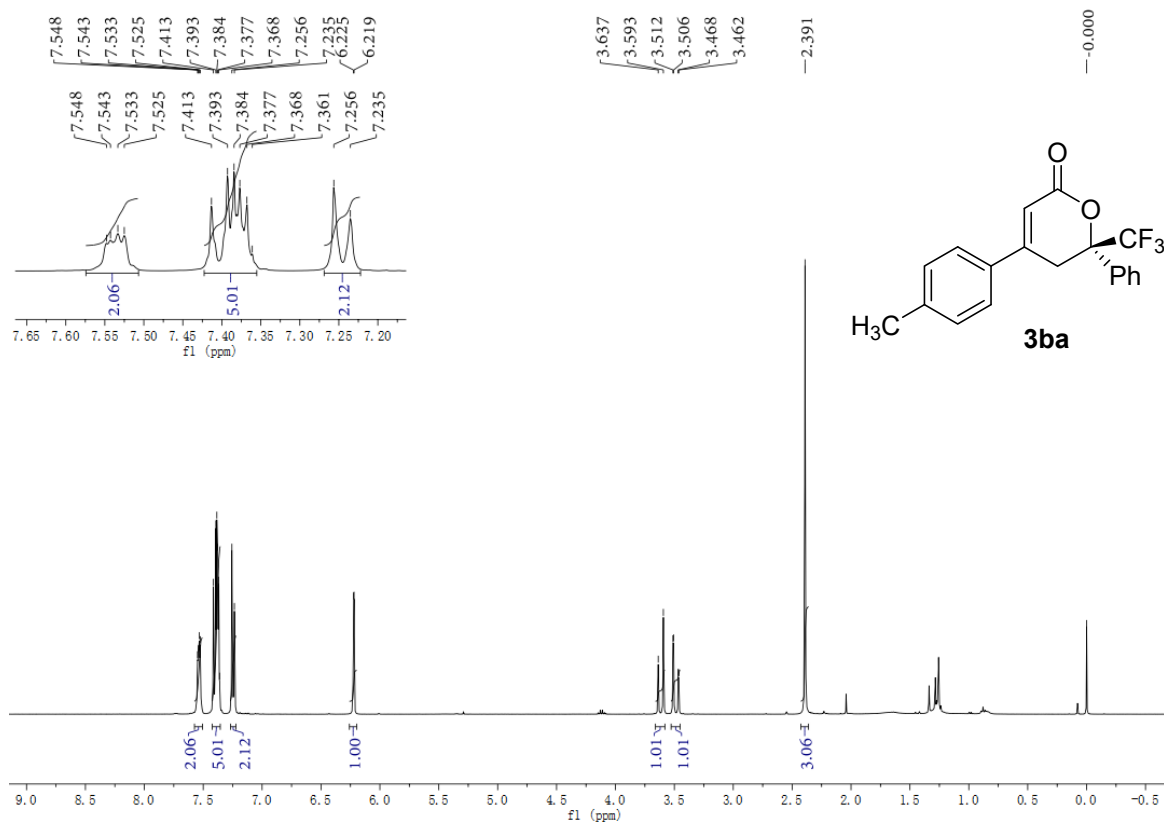

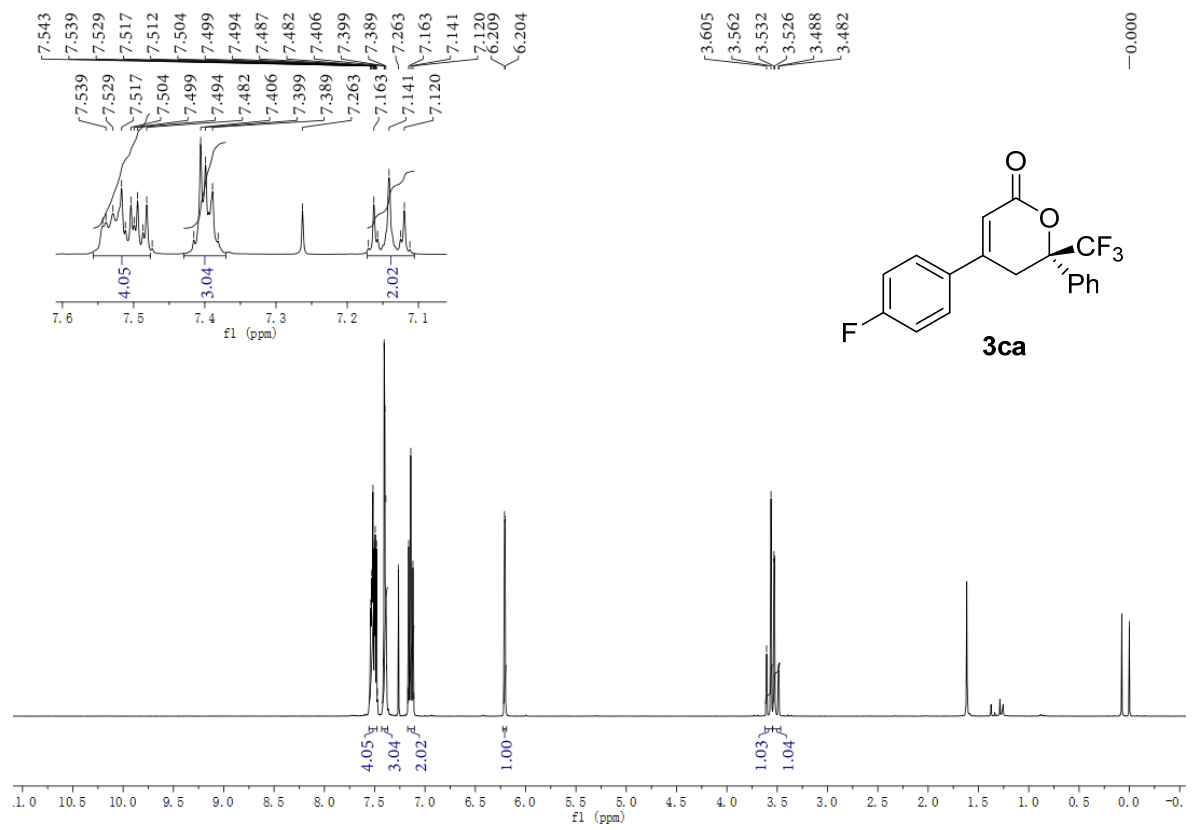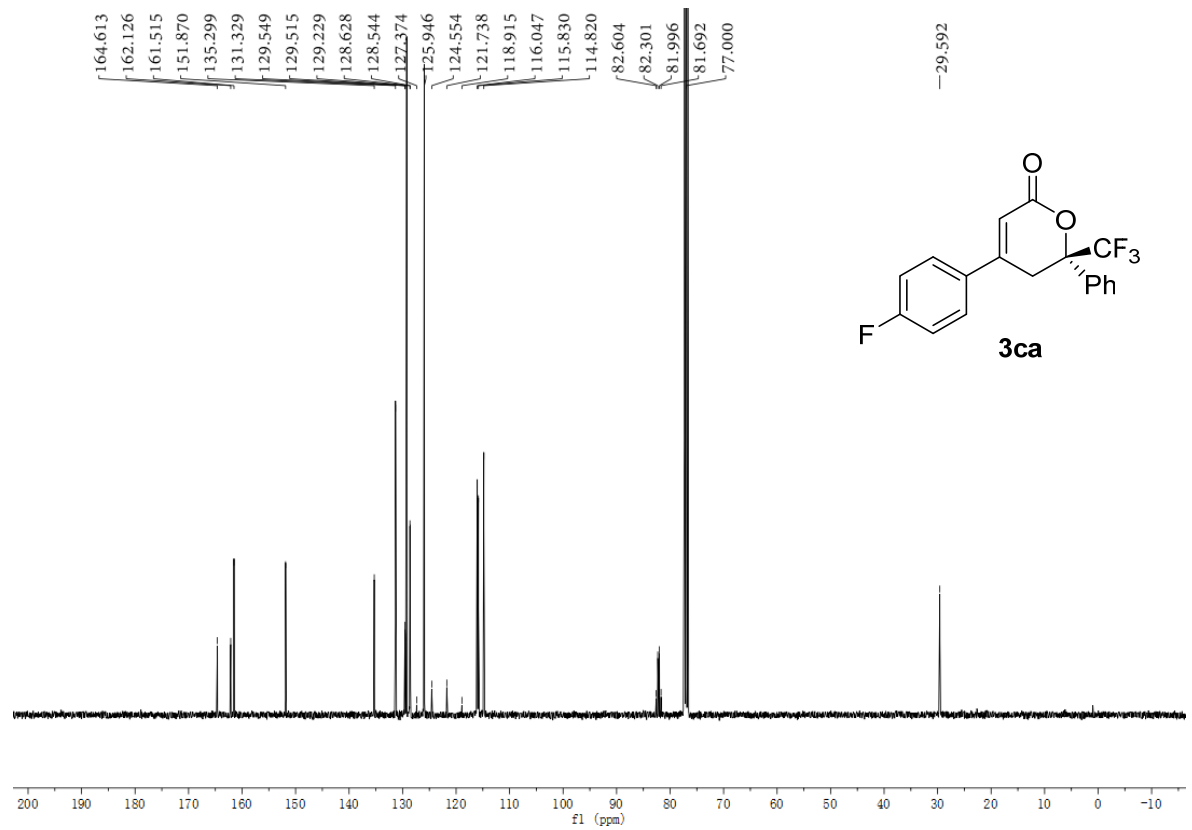

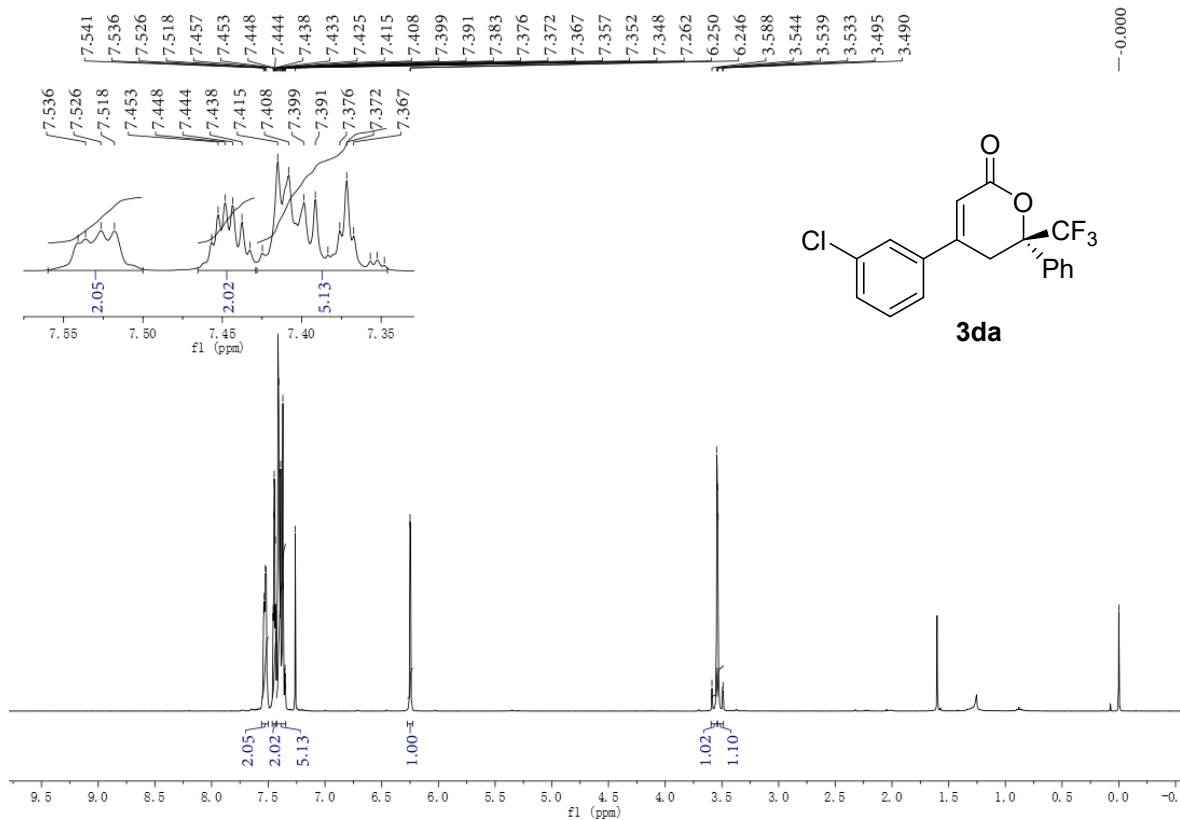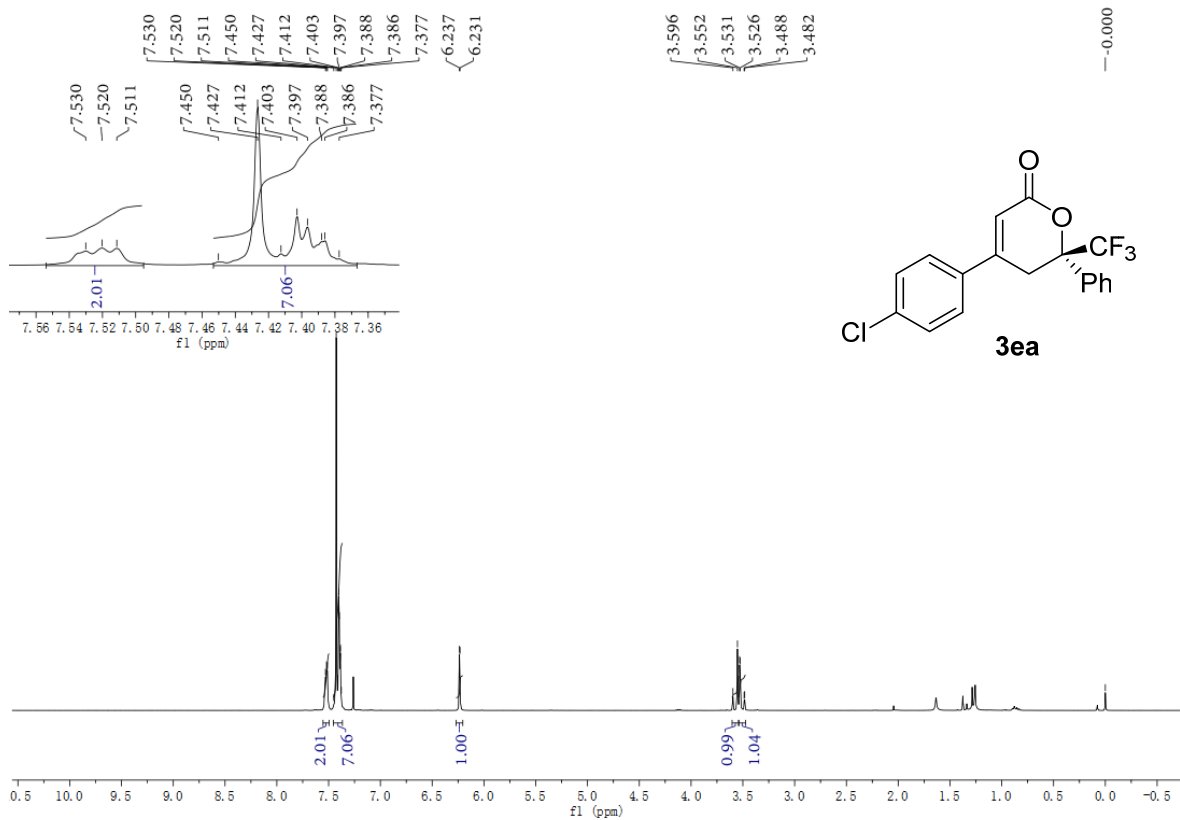





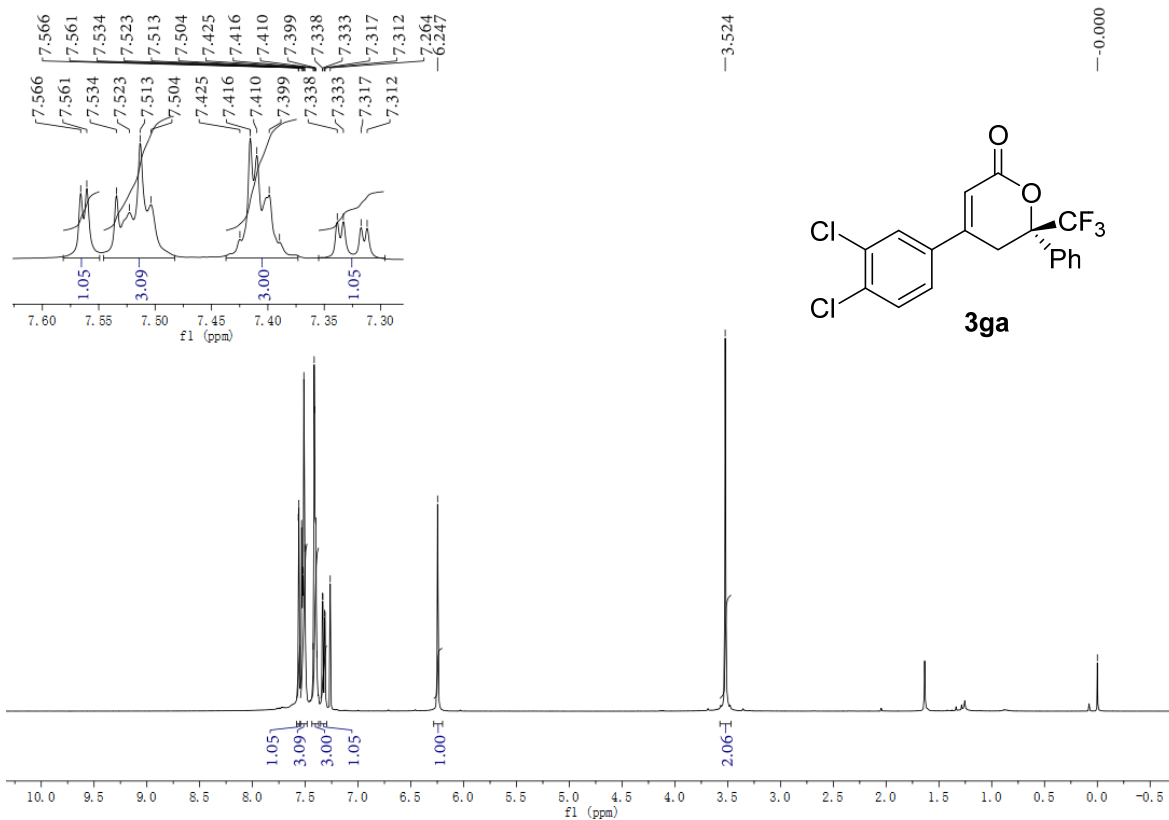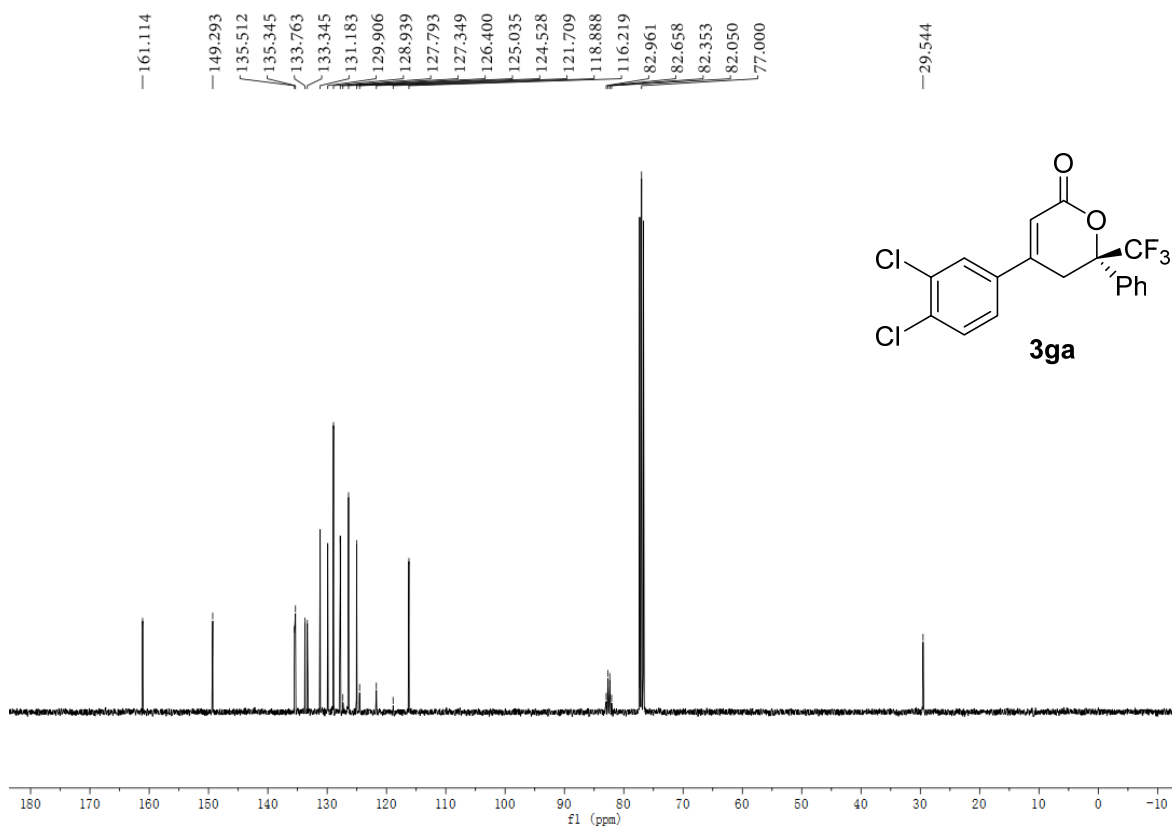

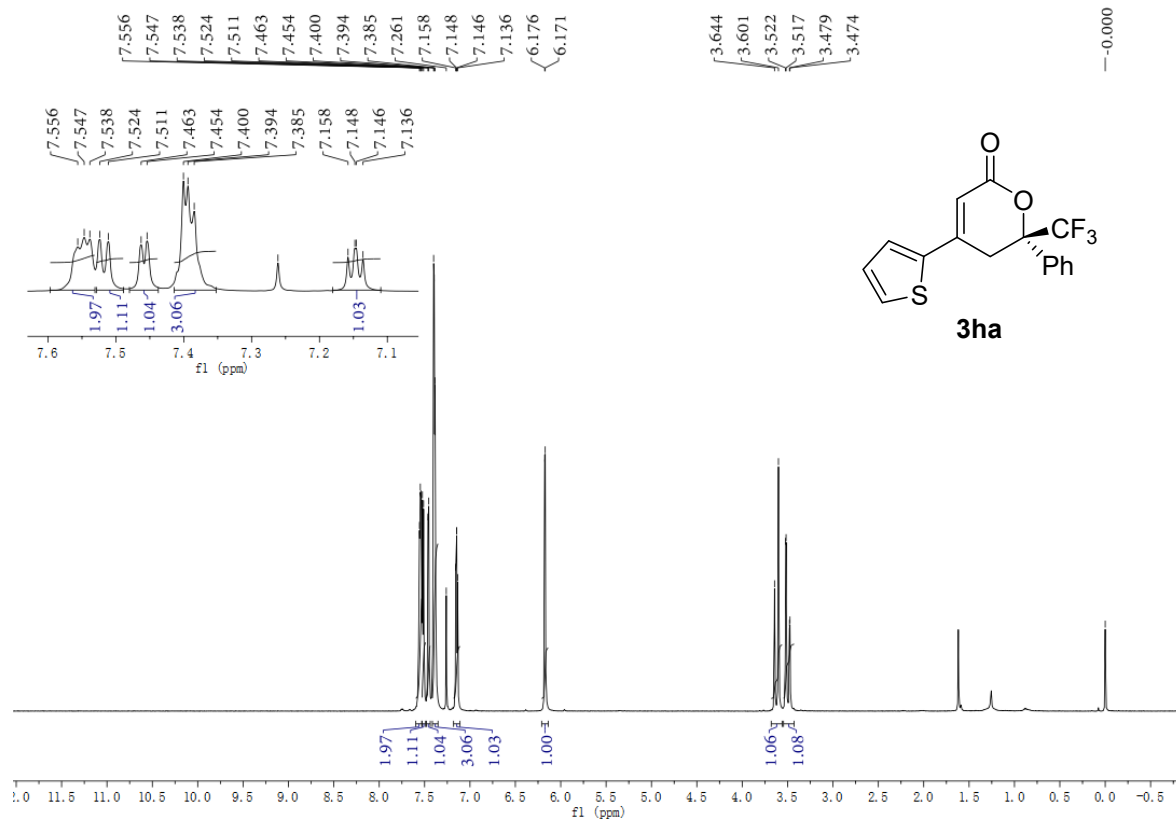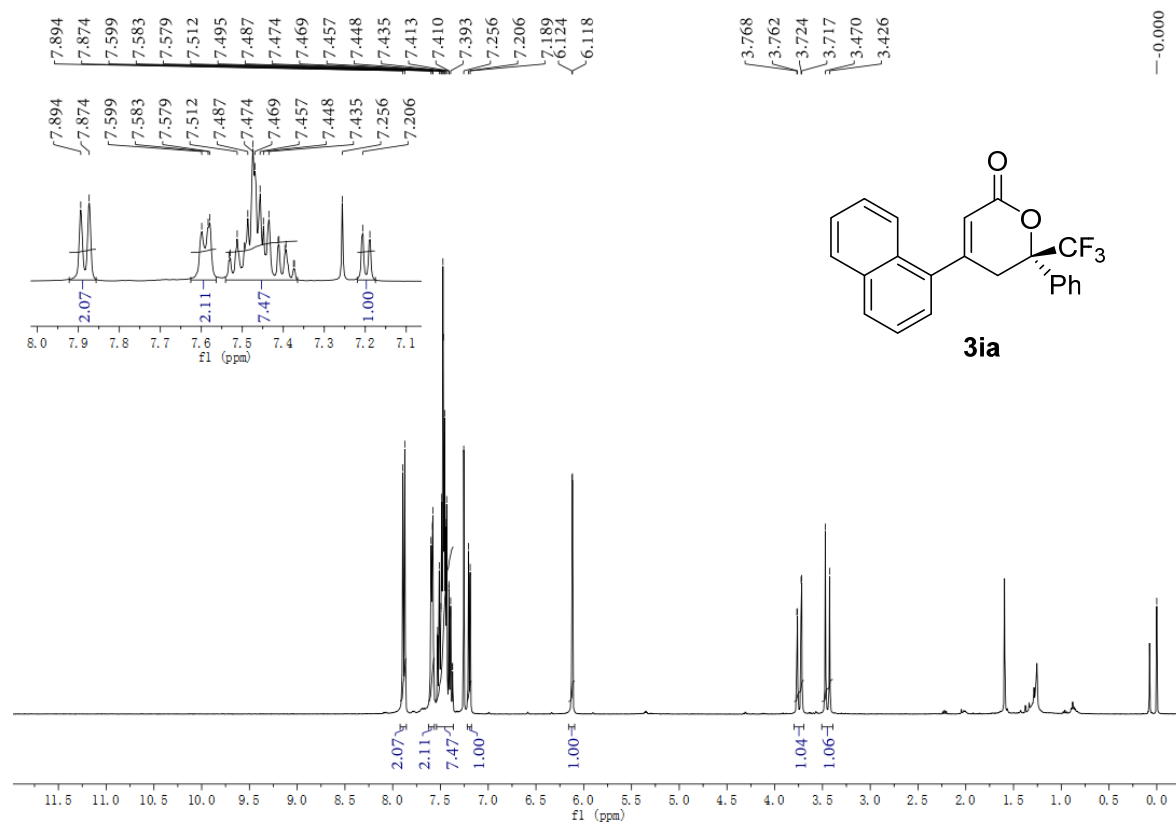

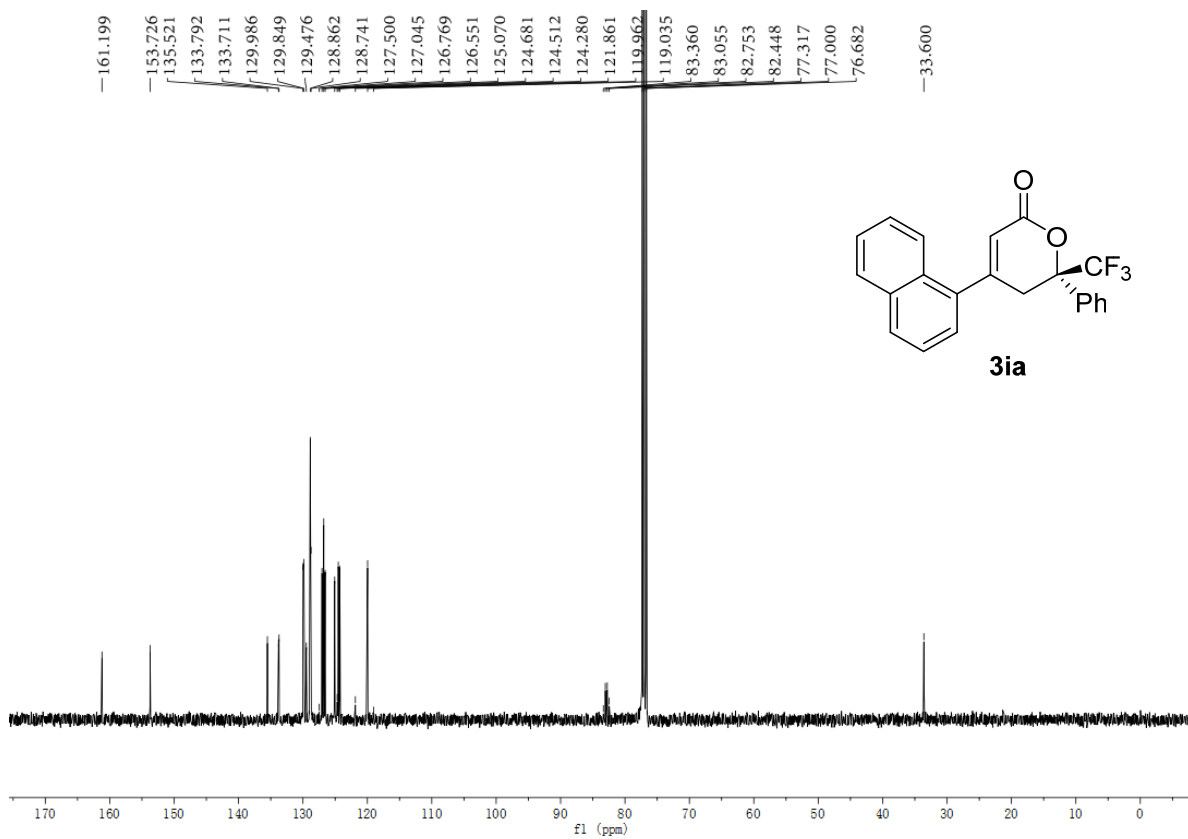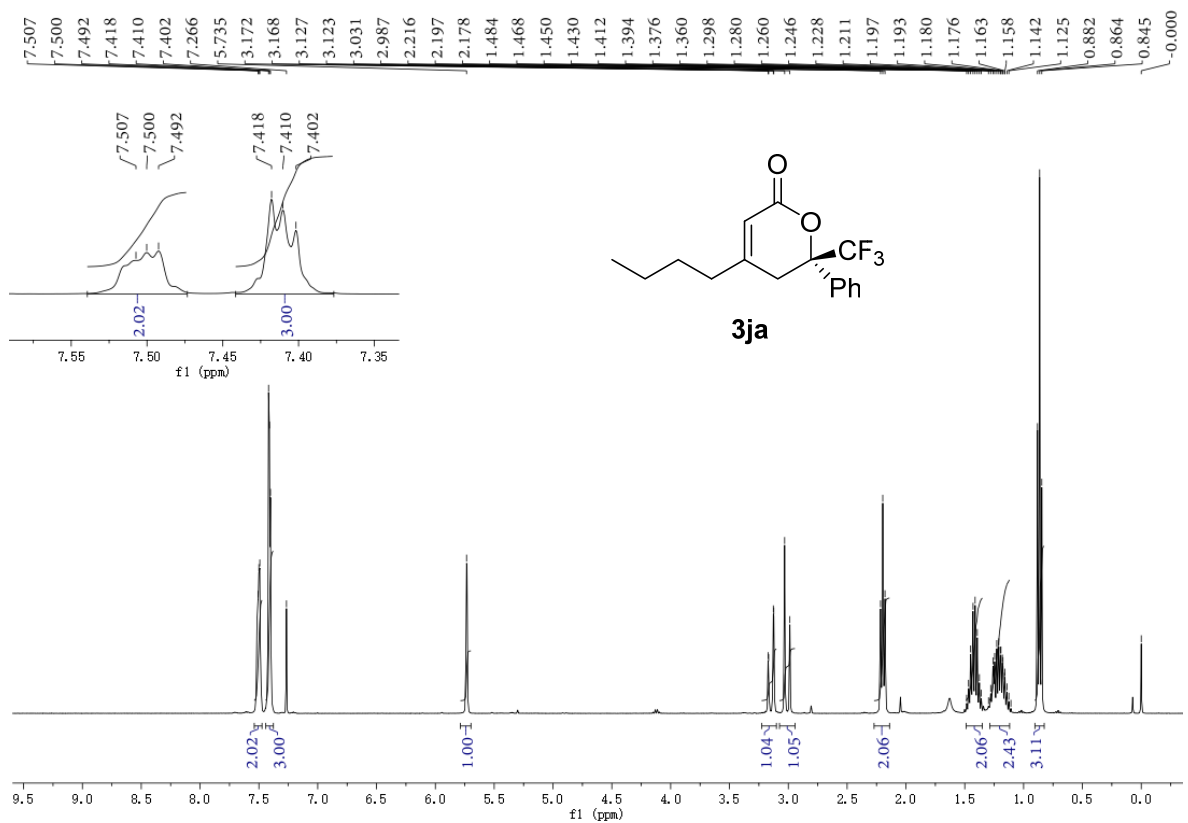

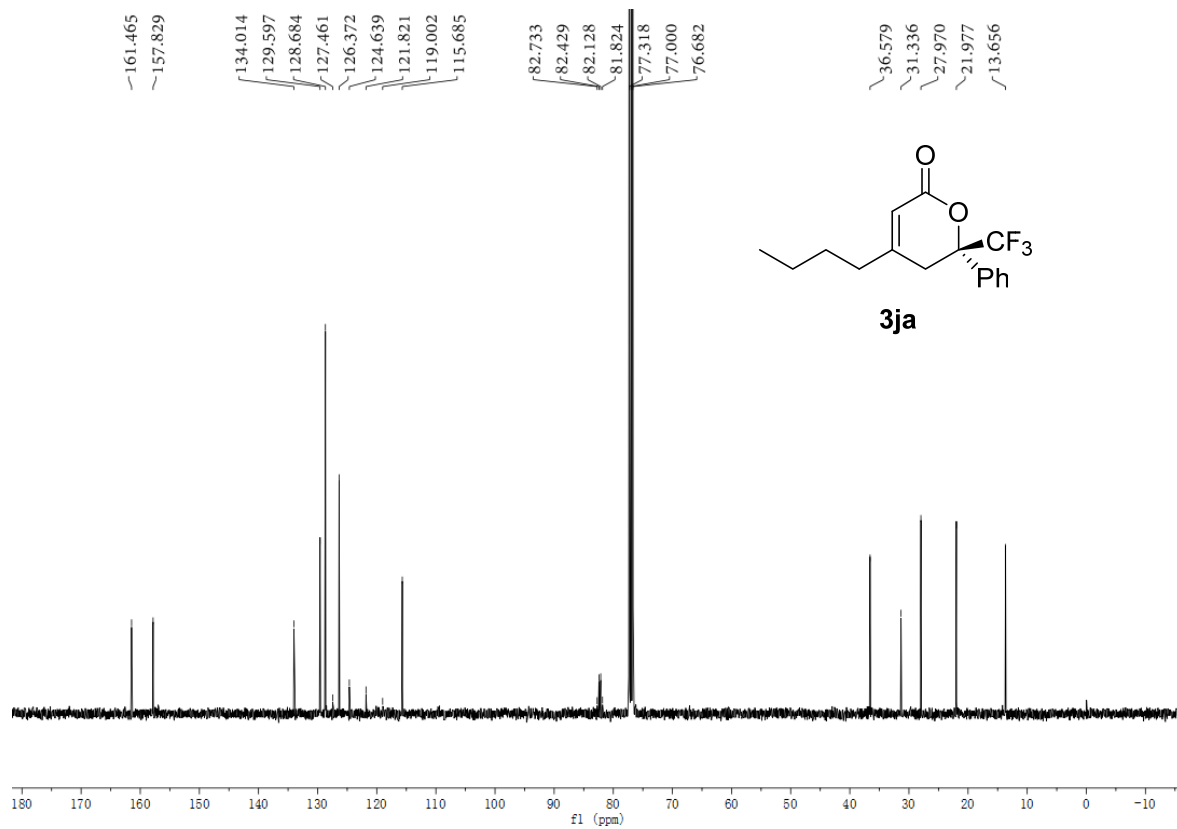

## 5. Copies of HPLC Spectra of the Products 3

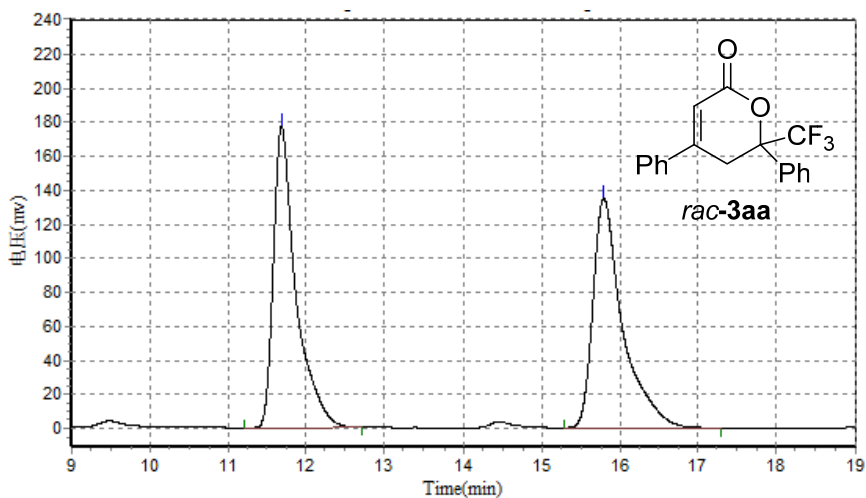

### Results

| Peak No.     | Peak ID | Ret Time | Height     | Area        | Conc.    |
|--------------|---------|----------|------------|-------------|----------|
| 1            |         | 11.687   | 176956.625 | 3525965.750 | 49.8998  |
| 2            |         | 15.793   | 134924.000 | 3540124.750 | 50.1002  |
| <b>Total</b> |         |          | 311880.625 | 7066090.500 | 100.0000 |

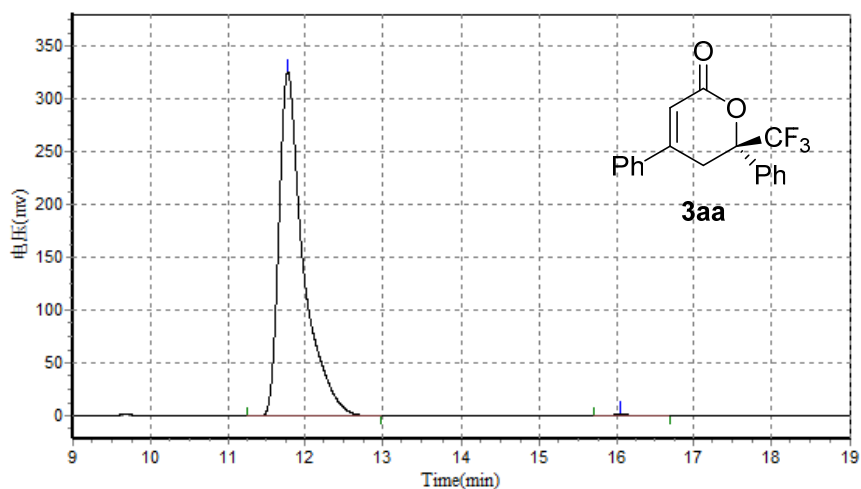

### Results

| Peak No.     | Peak ID | Ret Time | Height     | Area        | Conc.    |
|--------------|---------|----------|------------|-------------|----------|
| 1            |         | 11.772   | 325611.875 | 7091776.500 | 99.5413  |
| 2            |         | 16.048   | 1353.322   | 32678.002   | 0.4587   |
| <b>Total</b> |         |          | 326965.197 | 7124454.502 | 100.0000 |

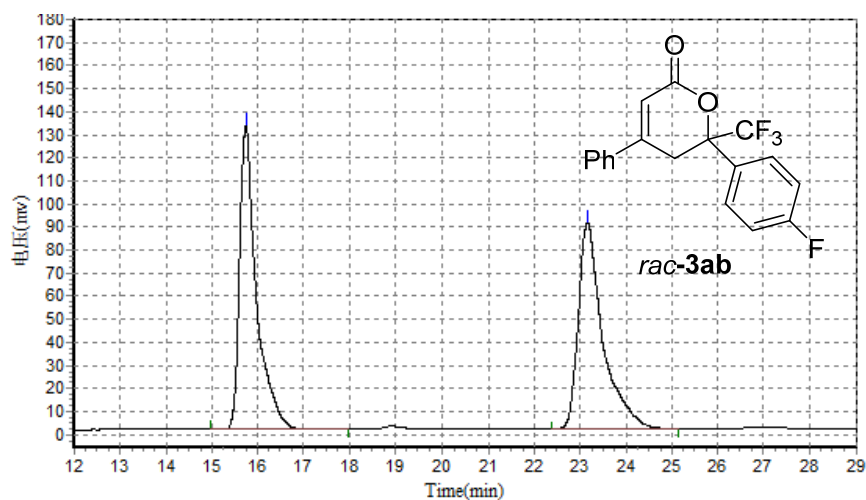

### Results

| Peak No.     | Peak ID | Ret Time | Height     | Area        | Conc.    |
|--------------|---------|----------|------------|-------------|----------|
| 1            |         | 15.743   | 131733.047 | 3350922.250 | 50.3672  |
| 2            |         | 23.163   | 89150.500  | 3302065.000 | 49.6328  |
| <b>Total</b> |         |          | 220883.547 | 6652987.250 | 100.0000 |

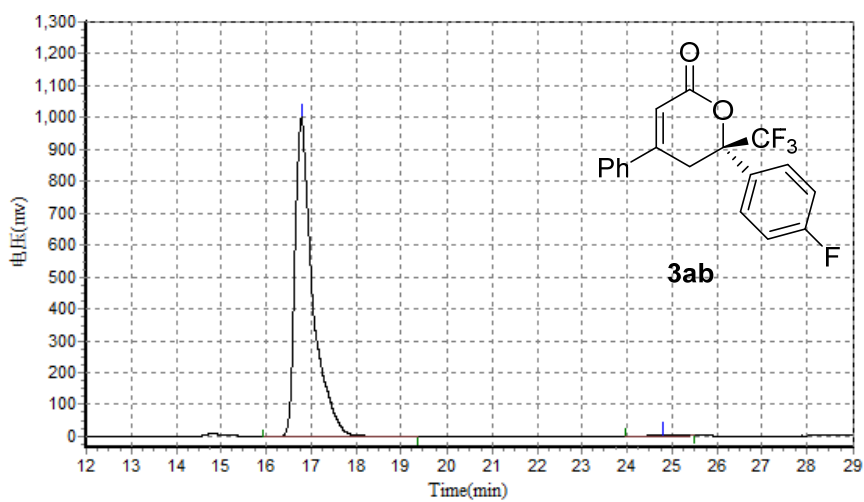

### Results

| Peak No.     | Peak ID | Ret Time | Height      | Area         | Conc.    |
|--------------|---------|----------|-------------|--------------|----------|
| 1            |         | 16.787   | 998433.375  | 27177788.000 | 99.8056  |
| 2            |         | 24.810   | 1777.917    | 52927.410    | 0.1944   |
| <b>Total</b> |         |          | 1000211.292 | 27230715.410 | 100.0000 |

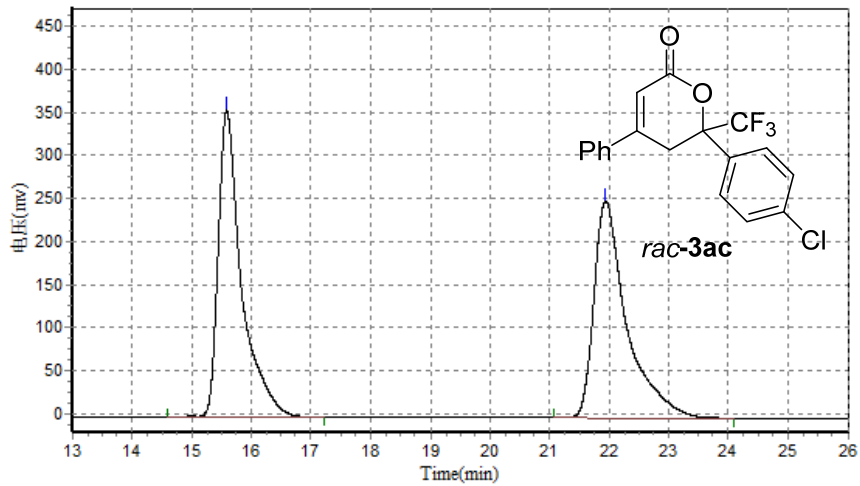

### Results

| Peak No.     | Peak ID | Ret Time | Height     | Area         | Conc.    |
|--------------|---------|----------|------------|--------------|----------|
| 1            |         | 15.588   | 356577.625 | 9659311.000  | 50.1484  |
| 2            |         | 21.940   | 251944.203 | 9602132.000  | 49.8516  |
| <b>Total</b> |         |          | 608521.828 | 19261443.000 | 100.0000 |

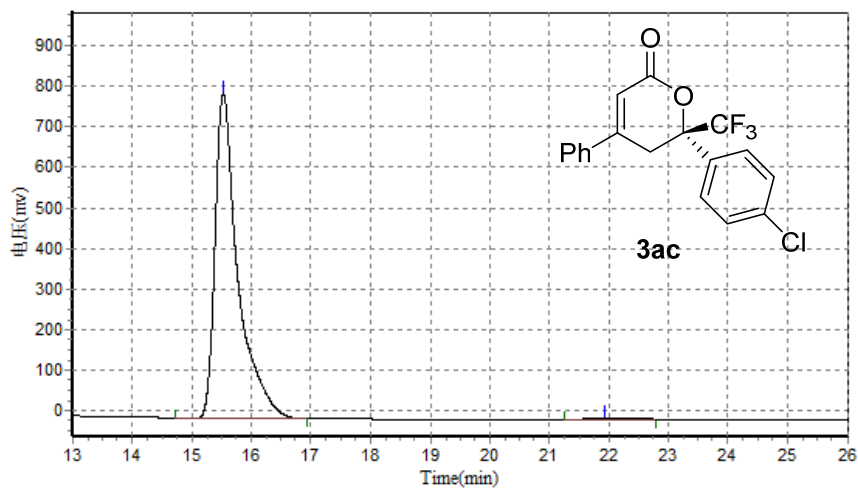

### Results

| Peak No.     | Peak ID | Ret Time | Height     | Area         | Conc.    |
|--------------|---------|----------|------------|--------------|----------|
| 1            |         | 15.532   | 798678.625 | 21308082.000 | 99.5746  |
| 2            |         | 21.920   | 2942.826   | 91027.516    | 0.4254   |
| <b>Total</b> |         |          | 801621.451 | 21399109.516 | 100.0000 |



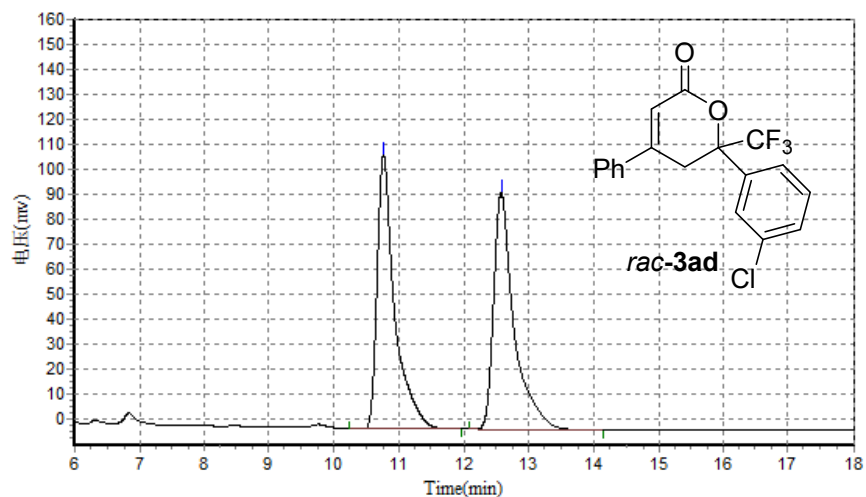

### Results

| Peak No.     | Peak ID | Ret Time | Height     | Area        | Conc.    |
|--------------|---------|----------|------------|-------------|----------|
| 1            |         | 10.770   | 109468.711 | 2062802.625 | 49.7551  |
| 2            |         | 12.567   | 94835.844  | 2083111.375 | 50.2449  |
| <b>Total</b> |         |          | 204304.555 | 4145914.000 | 100.0000 |

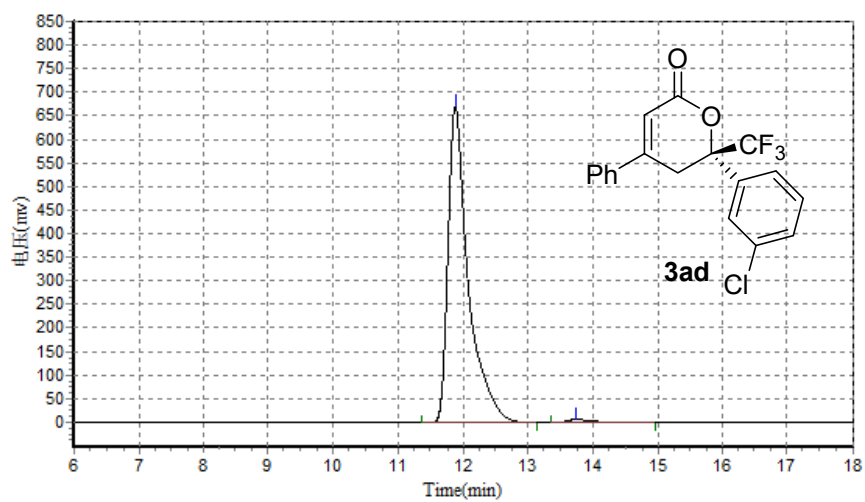

### Results

| Peak No.     | Peak ID | Ret Time | Height     | Area         | Conc.    |
|--------------|---------|----------|------------|--------------|----------|
| 1            |         | 11.872   | 670408.625 | 14579587.000 | 98.9015  |
| 2            |         | 13.747   | 6687.911   | 161932.547   | 1.0985   |
| <b>Total</b> |         |          | 677096.536 | 14741519.547 | 100.0000 |

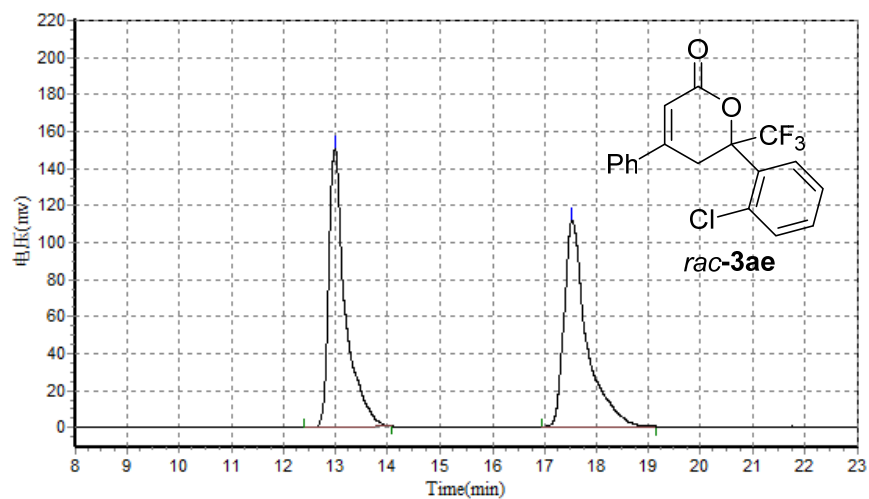

### Results

| Peak No.     | Peak ID | Ret Time | Height     | Area        | Conc.    |
|--------------|---------|----------|------------|-------------|----------|
| 1            |         | 12.997   | 150040.906 | 3339293.750 | 49.9181  |
| 2            |         | 17.527   | 111622.758 | 3350249.750 | 50.0819  |
| <b>Total</b> |         |          | 261663.664 | 6689543.500 | 100.0000 |

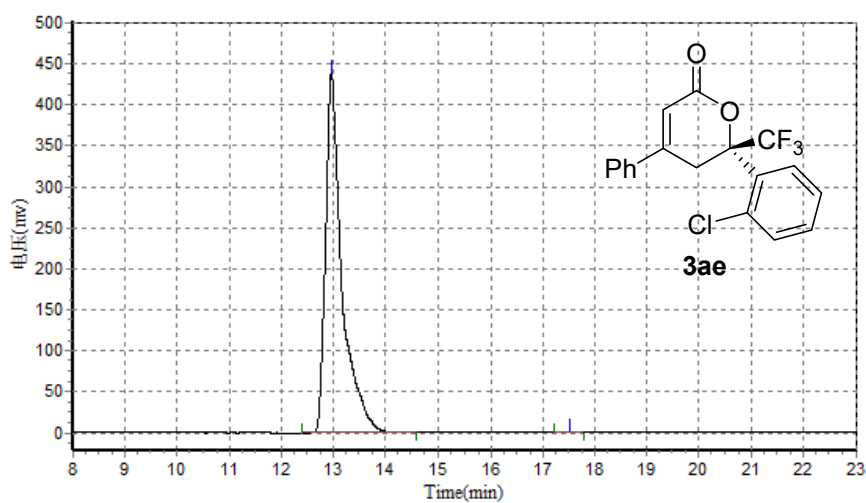

### Results

| Peak No.     | Peak ID | Ret Time | Height     | Area        | Conc.    |
|--------------|---------|----------|------------|-------------|----------|
| 1            |         | 12.962   | 438120.031 | 9558516.000 | 99.8415  |
| 2            |         | 17.518   | 819.023    | 15175.950   | 0.1585   |
| <b>Total</b> |         |          | 438939.054 | 9573691.950 | 100.0000 |

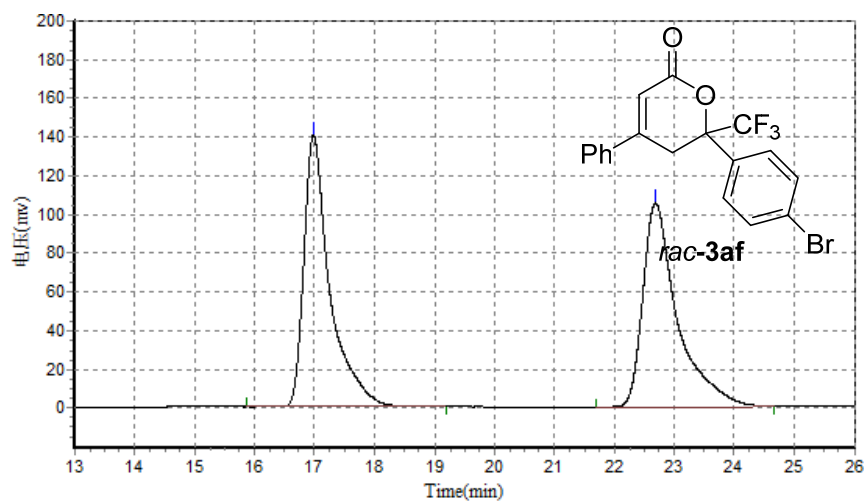

### Results

| Peak No.     | Peak ID | Ret Time | Height     | Area        | Conc.    |
|--------------|---------|----------|------------|-------------|----------|
| 1            |         | 16.988   | 140142.141 | 4232241.000 | 50.2405  |
| 2            |         | 22.687   | 105120.523 | 4191714.750 | 49.7595  |
| <b>Total</b> |         |          | 245262.664 | 8423955.750 | 100.0000 |

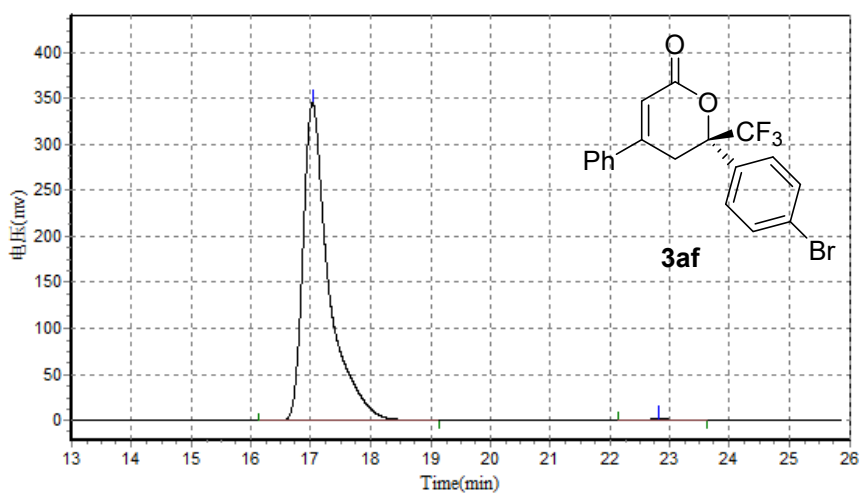

### Results

| Peak No.     | Peak ID | Ret Time | Height     | Area         | Conc.    |
|--------------|---------|----------|------------|--------------|----------|
| 1            |         | 17.037   | 344927.906 | 10318541.000 | 99.6145  |
| 2            |         | 22.820   | 1224.653   | 39927.602    | 0.3855   |
| <b>Total</b> |         |          | 346152.559 | 10358468.602 | 100.0000 |

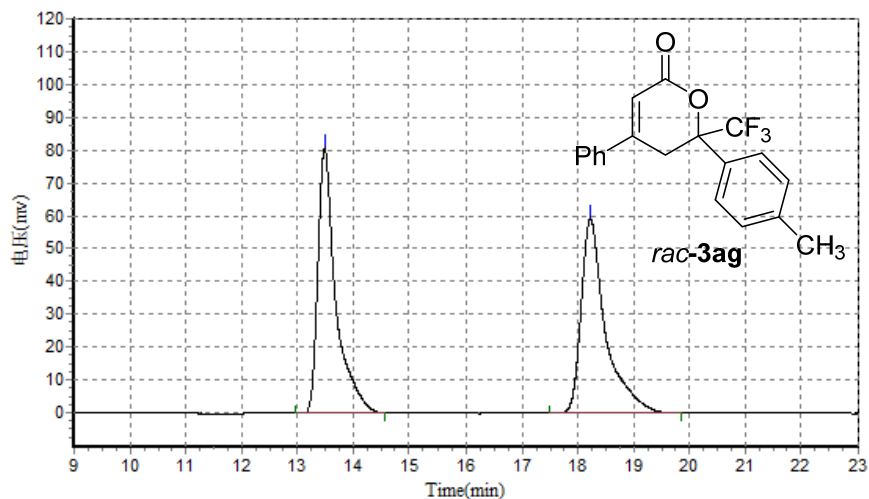

### Results

| Peak No.     | Peak ID | Ret Time | Height     | Area        | Conc.    |
|--------------|---------|----------|------------|-------------|----------|
| 1            |         | 13.488   | 80731.836  | 1802093.625 | 50.0225  |
| 2            |         | 18.222   | 59215.820  | 1800471.125 | 49.9775  |
| <b>Total</b> |         |          | 139947.656 | 3602564.750 | 100.0000 |

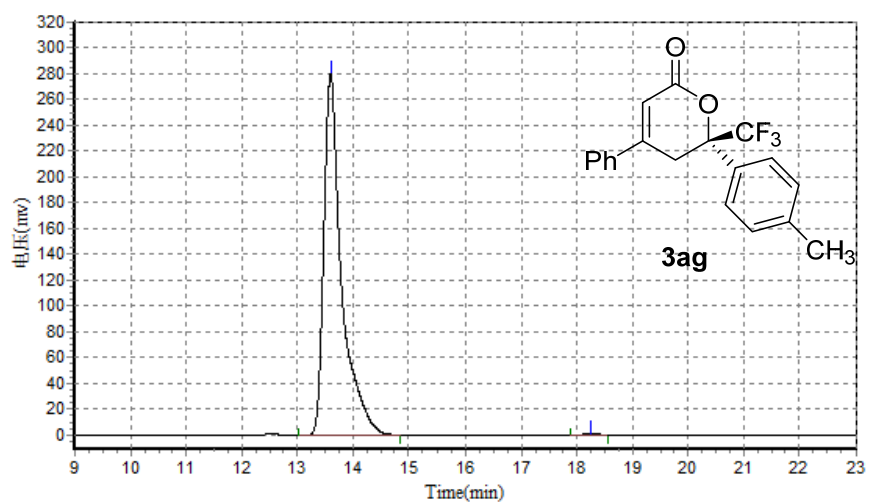

### Results

| Peak No.     | Peak ID | Ret Time | Height     | Area        | Conc.    |
|--------------|---------|----------|------------|-------------|----------|
| 1            |         | 13.597   | 279737.750 | 6185282.000 | 99.8194  |
| 2            |         | 18.245   | 559.227    | 11193.000   | 0.1806   |
| <b>Total</b> |         |          | 280296.977 | 6196475.000 | 100.0000 |

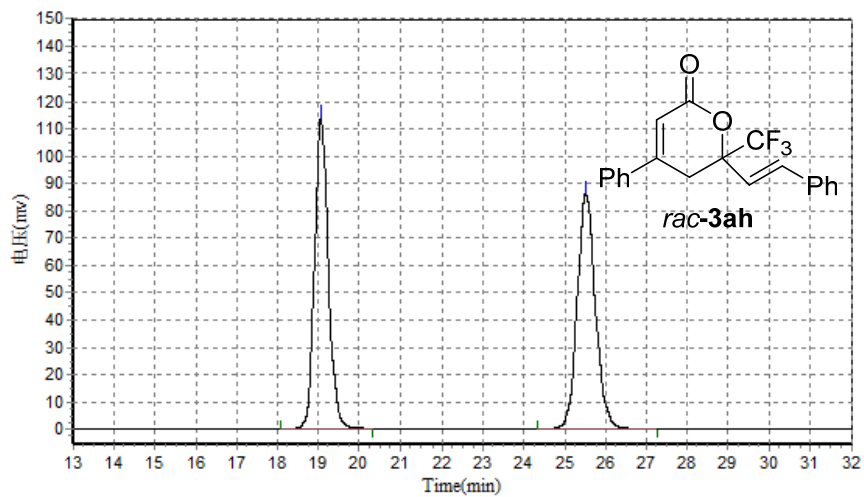

### Results

| Peak No.     | Peak ID | Ret Time | Height     | Area        | Conc.    |
|--------------|---------|----------|------------|-------------|----------|
| 1            |         | 19.053   | 113714.773 | 2666137.500 | 49.9611  |
| 2            |         | 25.507   | 86113.391  | 2670287.500 | 50.0389  |
| <b>Total</b> |         |          | 199828.164 | 5336425.000 | 100.0000 |

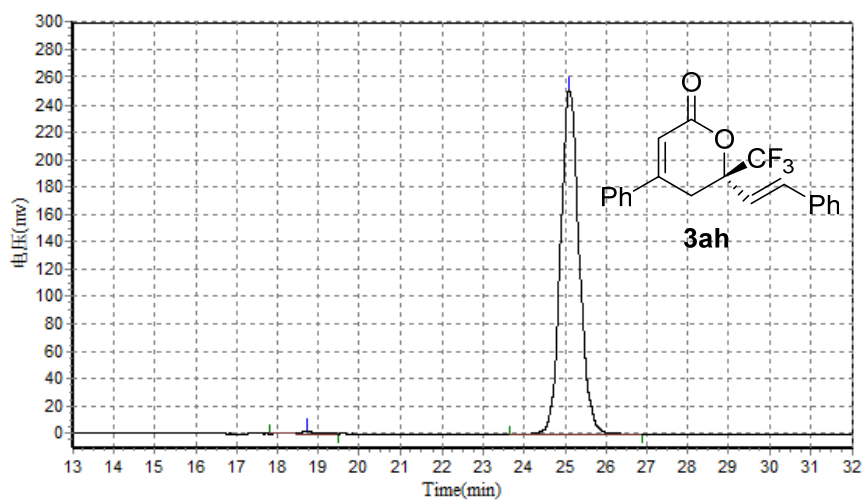

### Results

| Peak No.     | Peak ID | Ret Time | Height     | Area        | Conc.    |
|--------------|---------|----------|------------|-------------|----------|
| 1            |         | 18.728   | 1608.469   | 40082.301   | 0.5005   |
| 2            |         | 25.098   | 251175.906 | 7968642.500 | 99.4995  |
| <b>Total</b> |         |          | 252784.375 | 8008724.801 | 100.0000 |

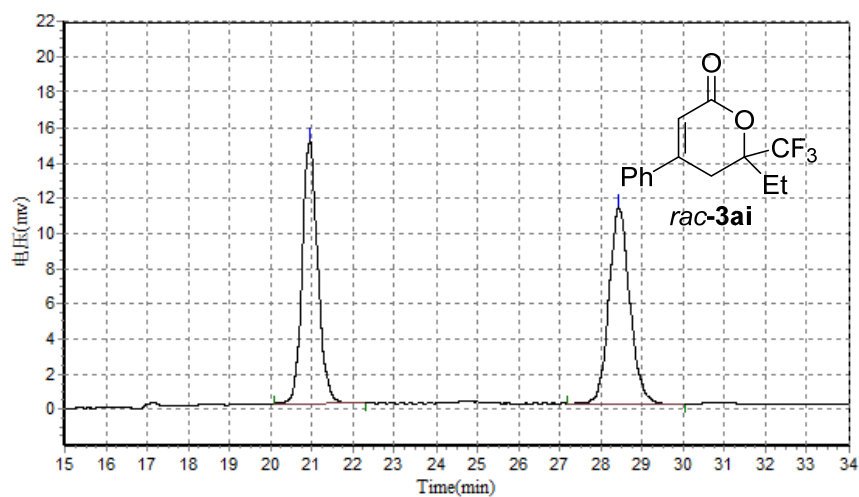

### Results

| Peak No.     | Peak ID | Ret Time | Height    | Area       | Conc.    |
|--------------|---------|----------|-----------|------------|----------|
| 1            |         | 20.958   | 14925.946 | 391908.344 | 49.8716  |
| 2            |         | 28.422   | 11158.030 | 393925.969 | 50.1284  |
| <b>Total</b> |         |          | 26083.977 | 785834.313 | 100.0000 |

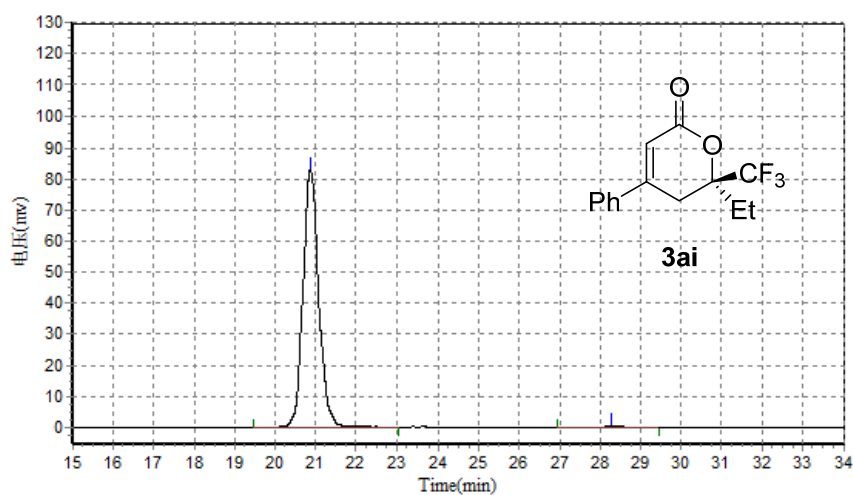

### Results

| Peak No.     | Peak ID | Ret Time | Height    | Area        | Conc.    |
|--------------|---------|----------|-----------|-------------|----------|
| 1            |         | 20.862   | 82819.188 | 2224088.000 | 99.4840  |
| 2            |         | 28.258   | 246.535   | 11535.000   | 0.5160   |
| <b>Total</b> |         |          | 83065.722 | 2235623.000 | 100.0000 |

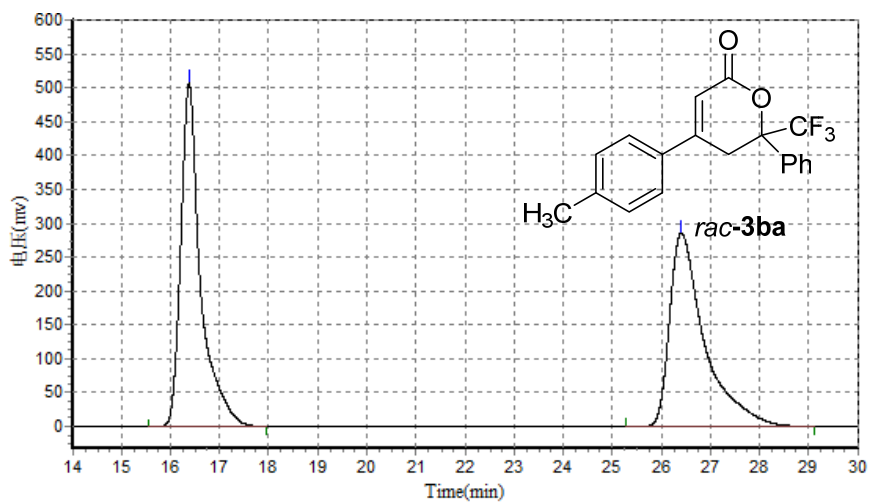

### Results

| Peak No.     | Peak ID | Ret Time | Height     | Area         | Conc.    |
|--------------|---------|----------|------------|--------------|----------|
| 1            |         | 16.372   | 506154.406 | 14178490.000 | 50.0639  |
| 2            |         | 26.412   | 285633.594 | 14142320.000 | 49.9361  |
| <b>Total</b> |         |          | 791788.000 | 28320810.000 | 100.0000 |

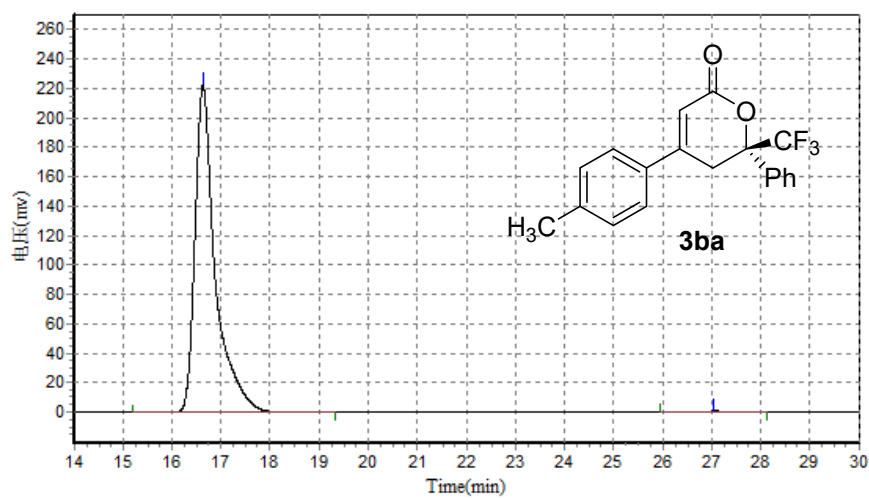

### Results

| Peak No.     | Peak ID | Ret Time | Height     | Area        | Conc.    |
|--------------|---------|----------|------------|-------------|----------|
| 1            |         | 16.627   | 222027.406 | 6378714.000 | 99.5913  |
| 2            |         | 27.040   | 670.343    | 26177.498   | 0.4087   |
| <b>Total</b> |         |          | 222697.750 | 6404891.498 | 100.0000 |

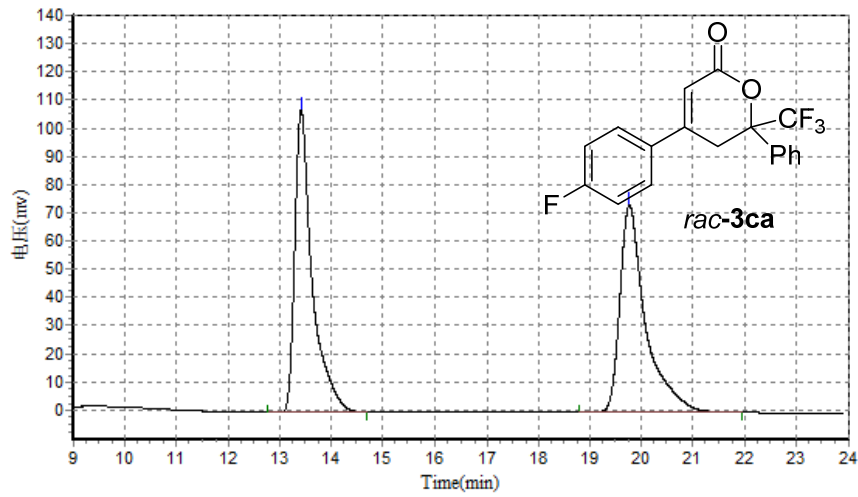

### Results

| Peak No.     | Peak ID | Ret Time | Height     | Area        | Conc.    |
|--------------|---------|----------|------------|-------------|----------|
| 1            |         | 13.420   | 107273.883 | 2520516.250 | 49.7671  |
| 2            |         | 19.765   | 73518.211  | 2544103.250 | 50.2329  |
| <b>Total</b> |         |          | 180792.094 | 5064619.500 | 100.0000 |

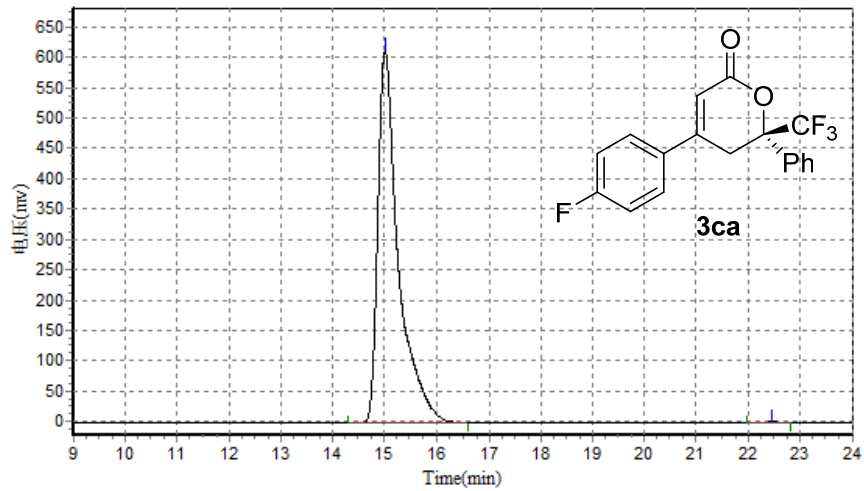

### Results

| Peak No.     | Peak ID | Ret Time | Height     | Area         | Conc.    |
|--------------|---------|----------|------------|--------------|----------|
| 1            |         | 15.015   | 611238.938 | 16811072.000 | 99.8837  |
| 2            |         | 22.467   | 792.086    | 19581.701    | 0.1163   |
| <b>Total</b> |         |          | 612031.024 | 16830653.701 | 100.0000 |



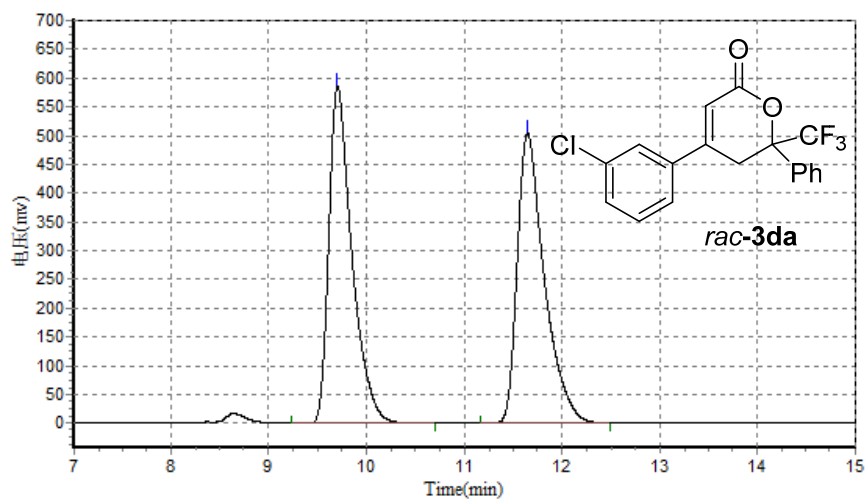

### Results

| Peak No.     | Peak ID | Ret Time | Height      | Area         | Conc.    |
|--------------|---------|----------|-------------|--------------|----------|
| 1            |         | 9.707    | 584823.938  | 9657408.000  | 49.7771  |
| 2            |         | 11.645   | 504012.844  | 9743881.000  | 50.2229  |
| <b>Total</b> |         |          | 1088836.781 | 19401289.000 | 100.0000 |

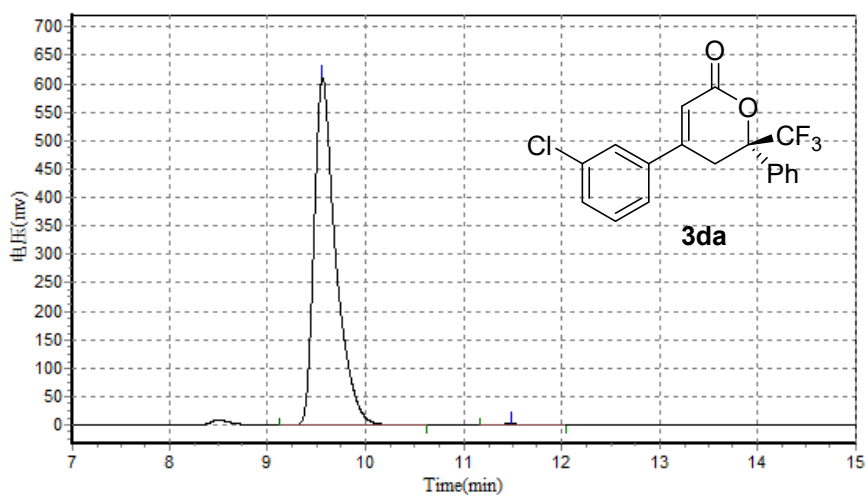

### Results

| Peak No.     | Peak ID | Ret Time | Height     | Area        | Conc.    |
|--------------|---------|----------|------------|-------------|----------|
| 1            |         | 9.562    | 609451.125 | 9425343.000 | 99.6215  |
| 2            |         | 11.482   | 2061.542   | 35812.250   | 0.3785   |
| <b>Total</b> |         |          | 611512.667 | 9461155.250 | 100.0000 |

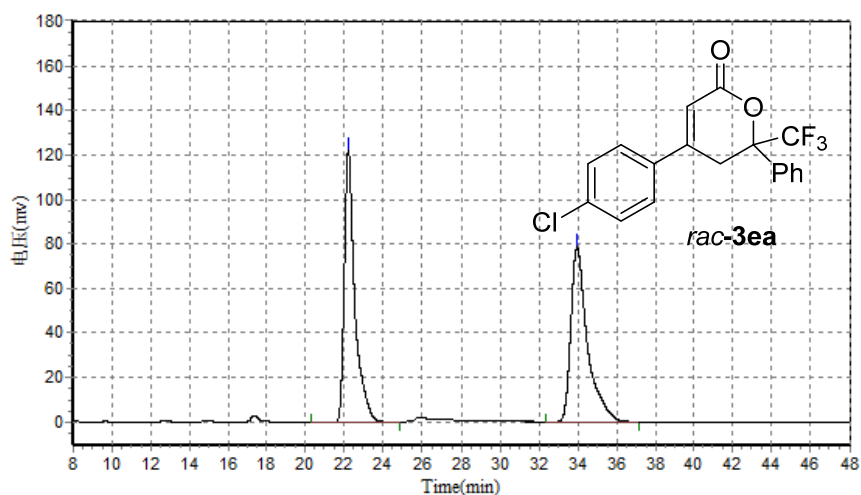

### Results

| Peak No.     | Peak ID | Ret Time | Height     | Area        | Conc.    |
|--------------|---------|----------|------------|-------------|----------|
| 1            |         | 22.212   | 121940.164 | 4591132.500 | 49.5659  |
| 2            |         | 33.953   | 78561.008  | 4671544.500 | 50.4341  |
| <b>Total</b> |         |          | 200501.172 | 9262677.000 | 100.0000 |

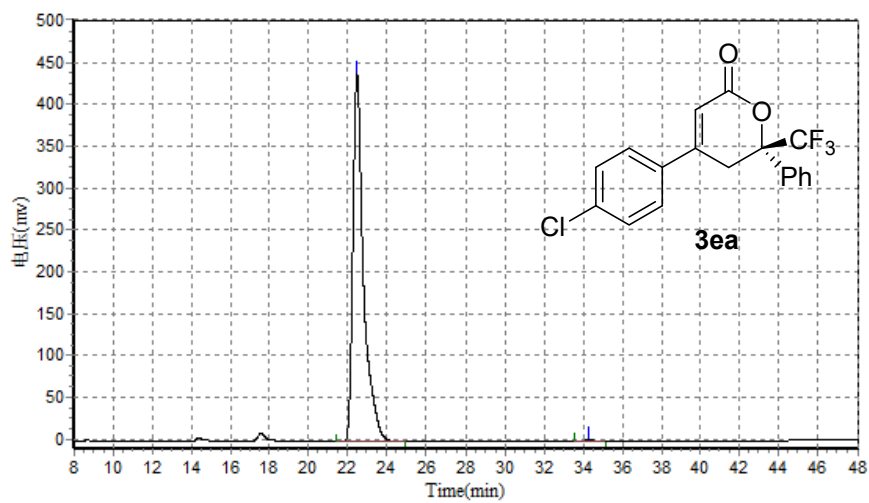

### Results

| Peak No.     | Peak ID | Ret Time | Height     | Area         | Conc.    |
|--------------|---------|----------|------------|--------------|----------|
| 1            |         | 22.478   | 439185.938 | 16603243.000 | 99.7899  |
| 2            |         | 34.257   | 791.459    | 34963.742    | 0.2101   |
| <b>Total</b> |         |          | 439977.396 | 16638206.742 | 100.0000 |

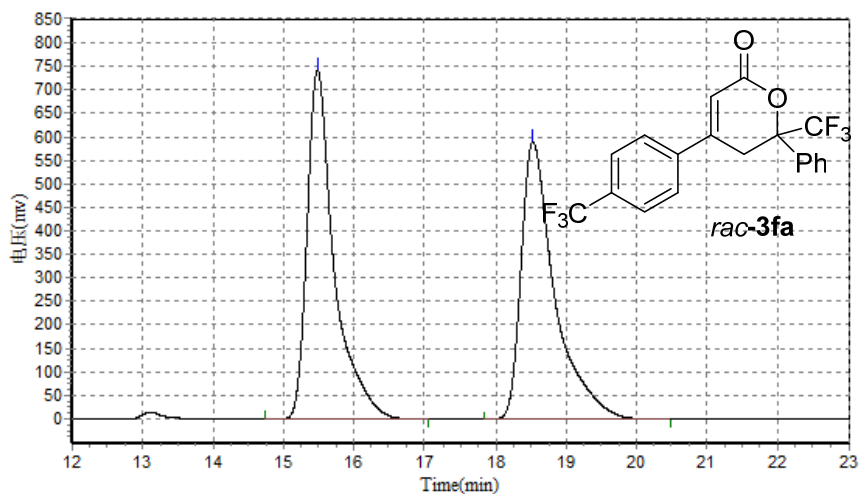

### Results

| Peak No.     | Peak ID | Ret Time | Height      | Area         | Conc.    |
|--------------|---------|----------|-------------|--------------|----------|
| 1            |         | 15.483   | 742989.313  | 19838678.000 | 50.3645  |
| 2            |         | 18.525   | 588889.250  | 19551558.000 | 49.6355  |
| <b>Total</b> |         |          | 1331878.563 | 39390236.000 | 100.0000 |

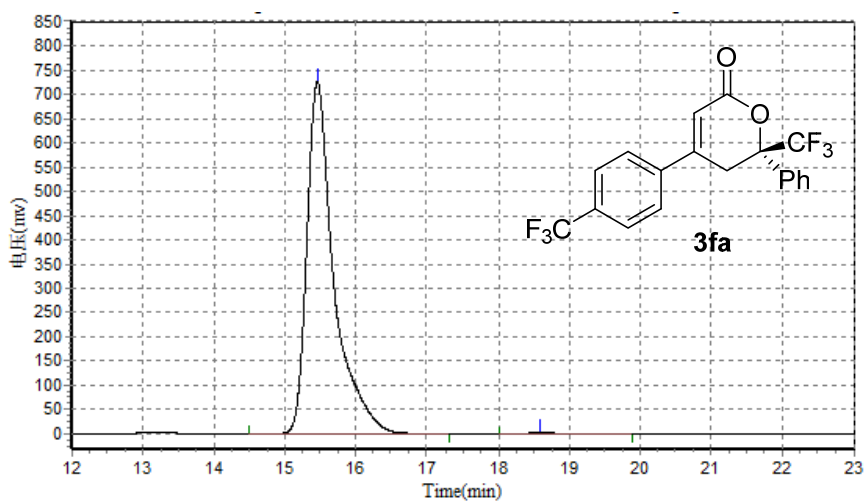

### Results

| Peak No.     | Peak ID | Ret Time | Height     | Area         | Conc.    |
|--------------|---------|----------|------------|--------------|----------|
| 1            |         | 15.460   | 725878.250 | 19139862.000 | 99.7769  |
| 2            |         | 18.583   | 1357.914   | 42789.102    | 0.2231   |
| <b>Total</b> |         |          | 727236.164 | 19182651.102 | 100.0000 |

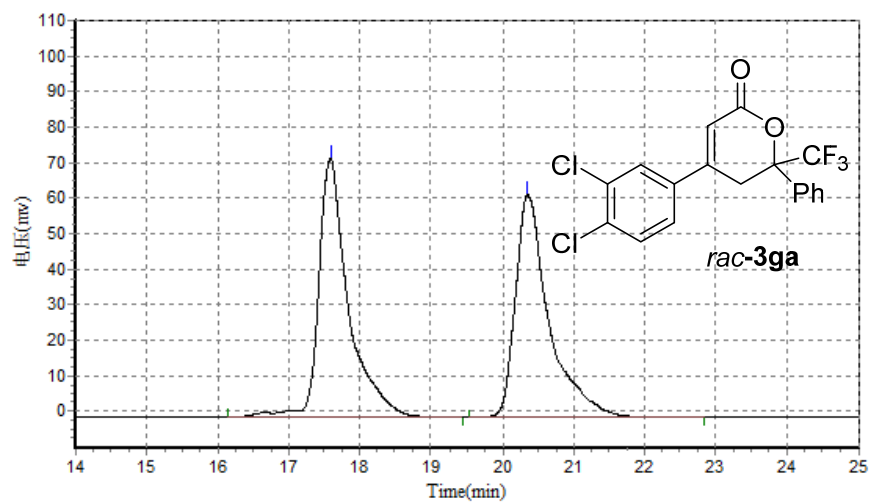

### Results

| Peak No.     | Peak ID | Ret Time | Height     | Area        | Conc.    |
|--------------|---------|----------|------------|-------------|----------|
| 1            |         | 17.590   | 72745.117  | 2112629.250 | 50.8934  |
| 2            |         | 20.347   | 62397.746  | 2038453.625 | 49.1065  |
| <b>Total</b> |         |          | 135142.863 | 4151082.875 | 100.0000 |

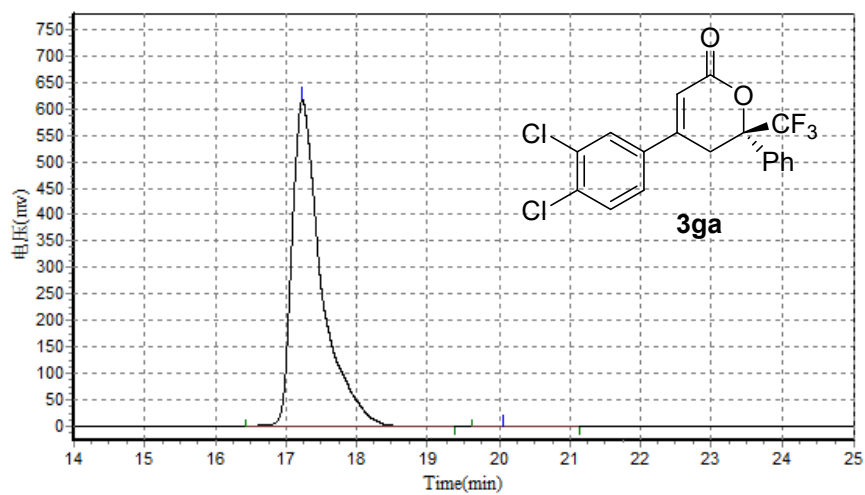

### Results

| Peak No.     | Peak ID | Ret Time | Height     | Area         | Conc.    |
|--------------|---------|----------|------------|--------------|----------|
| 1            |         | 17.232   | 619805.313 | 17907792.000 | 99.8231  |
| 2            |         | 20.062   | 1042.927   | 31737.453    | 0.1769   |
| <b>Total</b> |         |          | 620848.240 | 17939529.453 | 100.0000 |

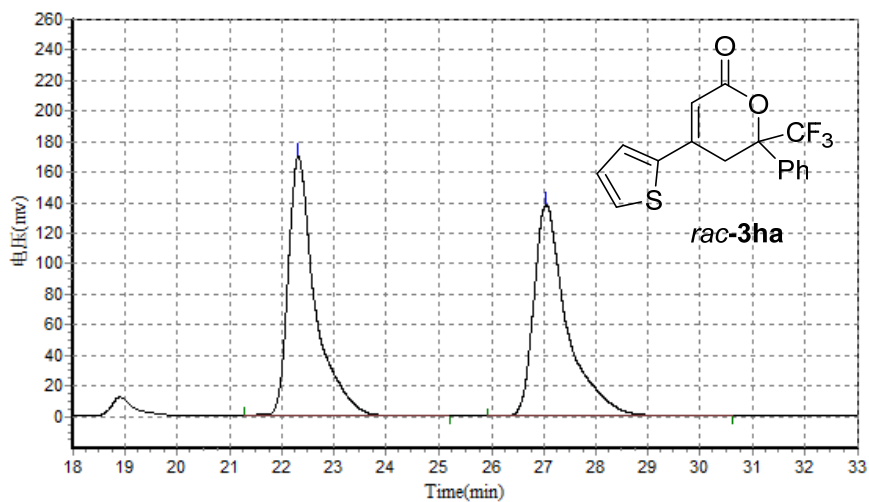

### Results

| Peak No.     | Peak ID | Ret Time | Height     | Area         | Conc.    |
|--------------|---------|----------|------------|--------------|----------|
| 1            |         | 22.318   | 170028.375 | 6071396.000  | 50.0078  |
| 2            |         | 27.050   | 138478.719 | 6069495.000  | 49.9922  |
| <b>Total</b> |         |          | 308507.094 | 12140891.000 | 100.0000 |

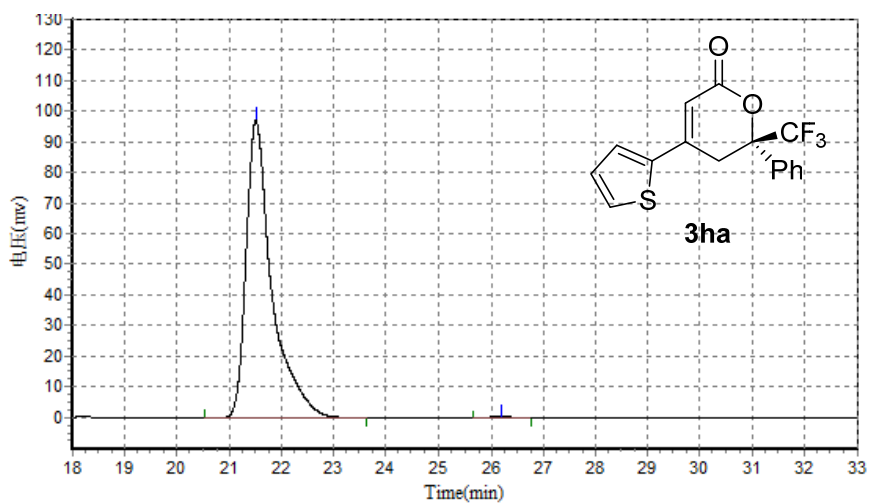

### Results

| Peak No.     | Peak ID | Ret Time | Height    | Area        | Conc.    |
|--------------|---------|----------|-----------|-------------|----------|
| 1            |         | 21.510   | 97177.414 | 3326105.250 | 99.7797  |
| 2            |         | 26.182   | 240.176   | 7344.000    | 0.2203   |
| <b>Total</b> |         |          | 97417.590 | 3333449.250 | 100.0000 |

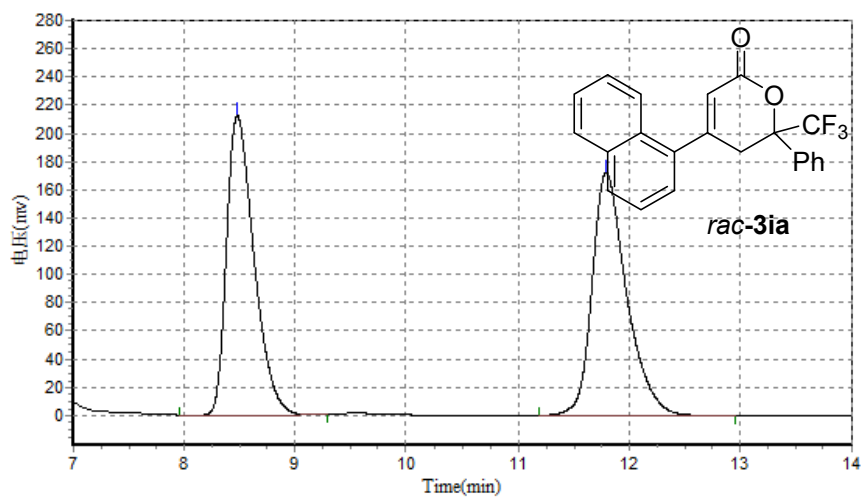

### Results

| Peak No.     | Peak ID | Ret Time | Height     | Area        | Conc.    |
|--------------|---------|----------|------------|-------------|----------|
| 1            |         | 8.478    | 212068.547 | 3650695.250 | 49.7112  |
| 2            |         | 11.795   | 171910.984 | 3693113.250 | 50.2888  |
| <b>Total</b> |         |          | 383979.531 | 7343808.500 | 100.0000 |

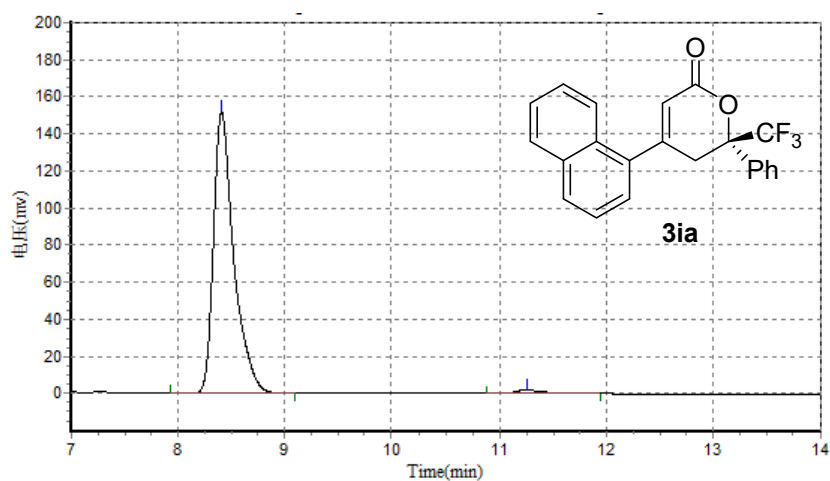

### Results

| Peak No.     | Peak ID | Ret Time | Height     | Area        | Conc.    |
|--------------|---------|----------|------------|-------------|----------|
| 1            |         | 8.408    | 151692.000 | 2009086.875 | 98.1803  |
| 2            |         | 11.253   | 1984.644   | 37237.051   | 1.8197   |
| <b>Total</b> |         |          | 153676.644 | 2046323.926 | 100.0000 |

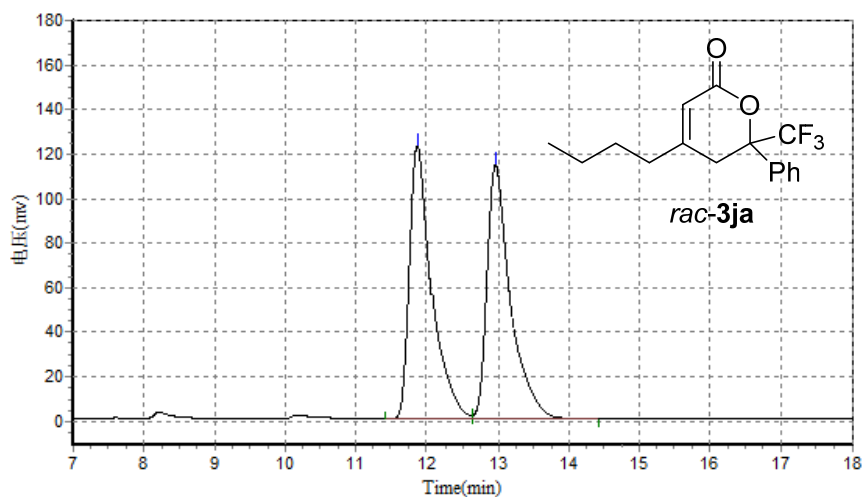

### Results

| Peak No.     | Peak ID | Ret Time | Height     | Area        | Conc.    |
|--------------|---------|----------|------------|-------------|----------|
| 1            |         | 11.872   | 122414.383 | 2609203.000 | 49.8990  |
| 2            |         | 12.958   | 113711.742 | 2619767.000 | 50.1010  |
| <b>Total</b> |         |          | 236126.125 | 5228970.000 | 100.0000 |

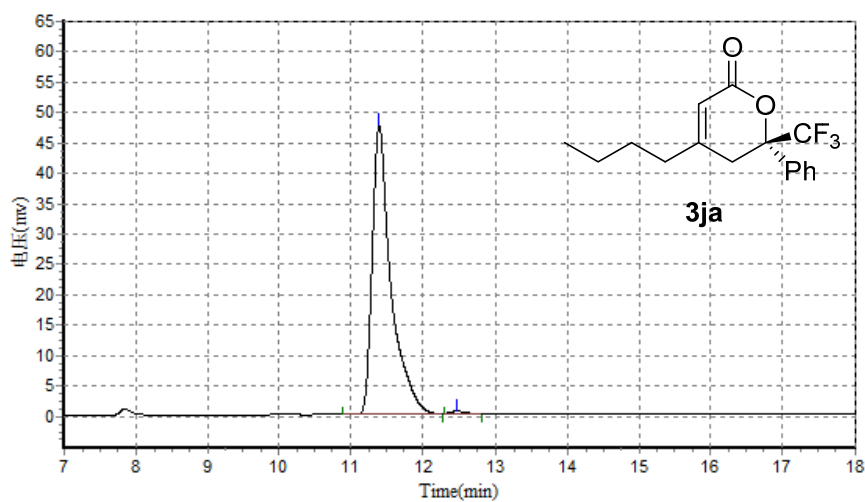

### Results

| Peak No.     | Peak ID | Ret Time | Height    | Area       | Conc.    |
|--------------|---------|----------|-----------|------------|----------|
| 1            |         | 11.393   | 47385.227 | 862194.375 | 99.3053  |
| 2            |         | 12.453   | 416.542   | 6031.899   | 0.6947   |
| <b>Total</b> |         |          | 47801.769 | 868226.274 | 100.0000 |
